# Supplementary material for: Immunomodulation of UVB-induced regulatory T cells prevents the establishment of squamous cell carcinoma
Source: Research Square preprint supplement (doi:10.21203/rs.3.rs-6935431/v1), 2025-07-03
Supplement: Supplementary file 1 [file 002a8ad93610a4c3557a611e.pdf]

## Supplementary Materials

### **Immunomodulation of UVB-induced regulatory T cells prevents the establishment of squamous cell carcinoma**

Shoaib Anwaar<sup>1</sup>, Amina Ashraf<sup>2</sup>, Sarah Jahfali<sup>1</sup>, Joseph Yunis<sup>1,3</sup>, Jazmina L. Gonzalez Cruz<sup>1,4</sup>, James W. Wells<sup>1,4\*</sup>

This file includes:

Figures S1-S5

Table S1

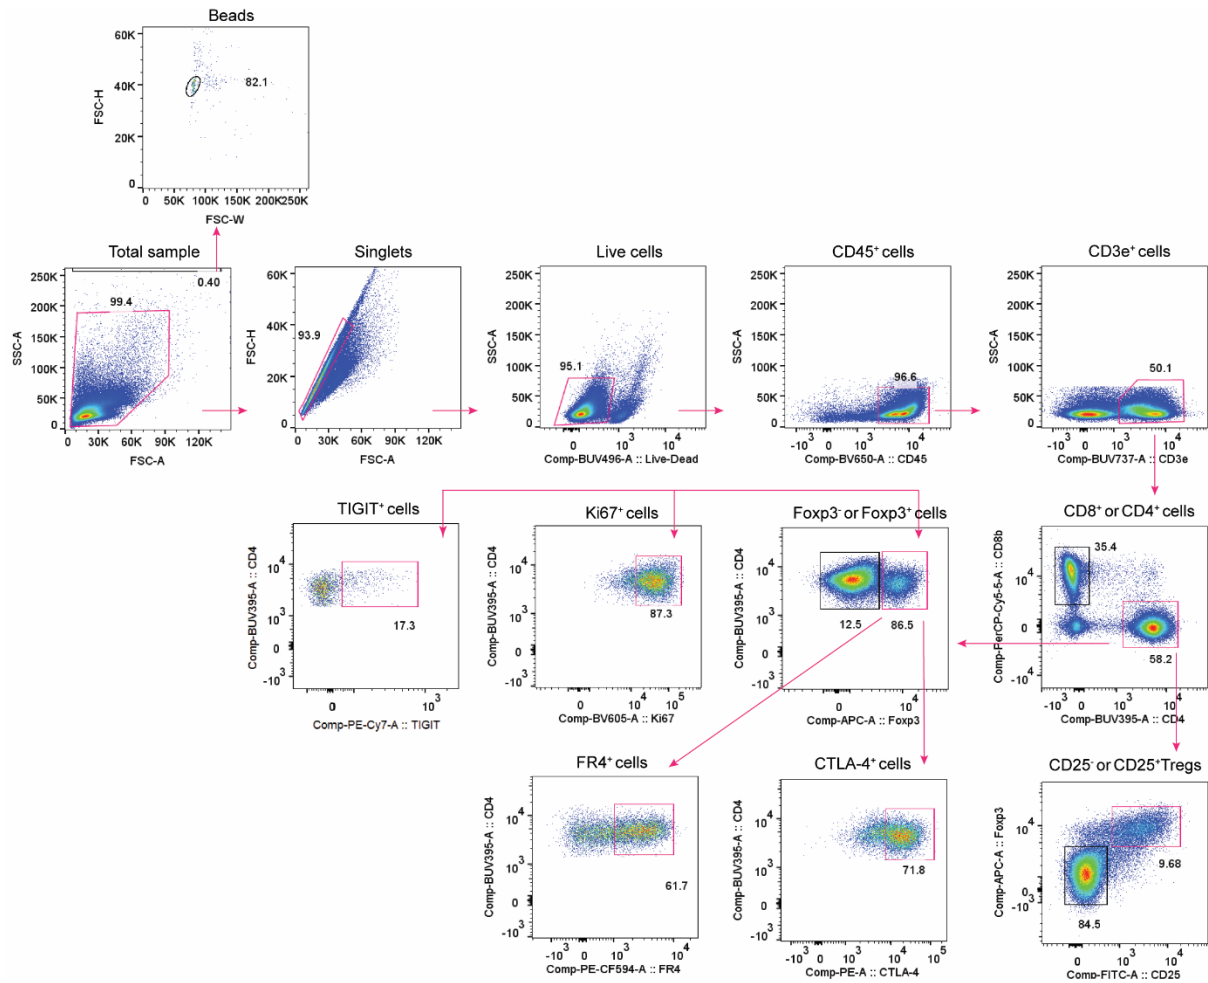

**Figure S1. Gating strategy for UVB-induced Treg phenotyping.** Representative flow plots illustrate the gating methodology used to identify and analyze Tregs in tissues post UVB exposure.

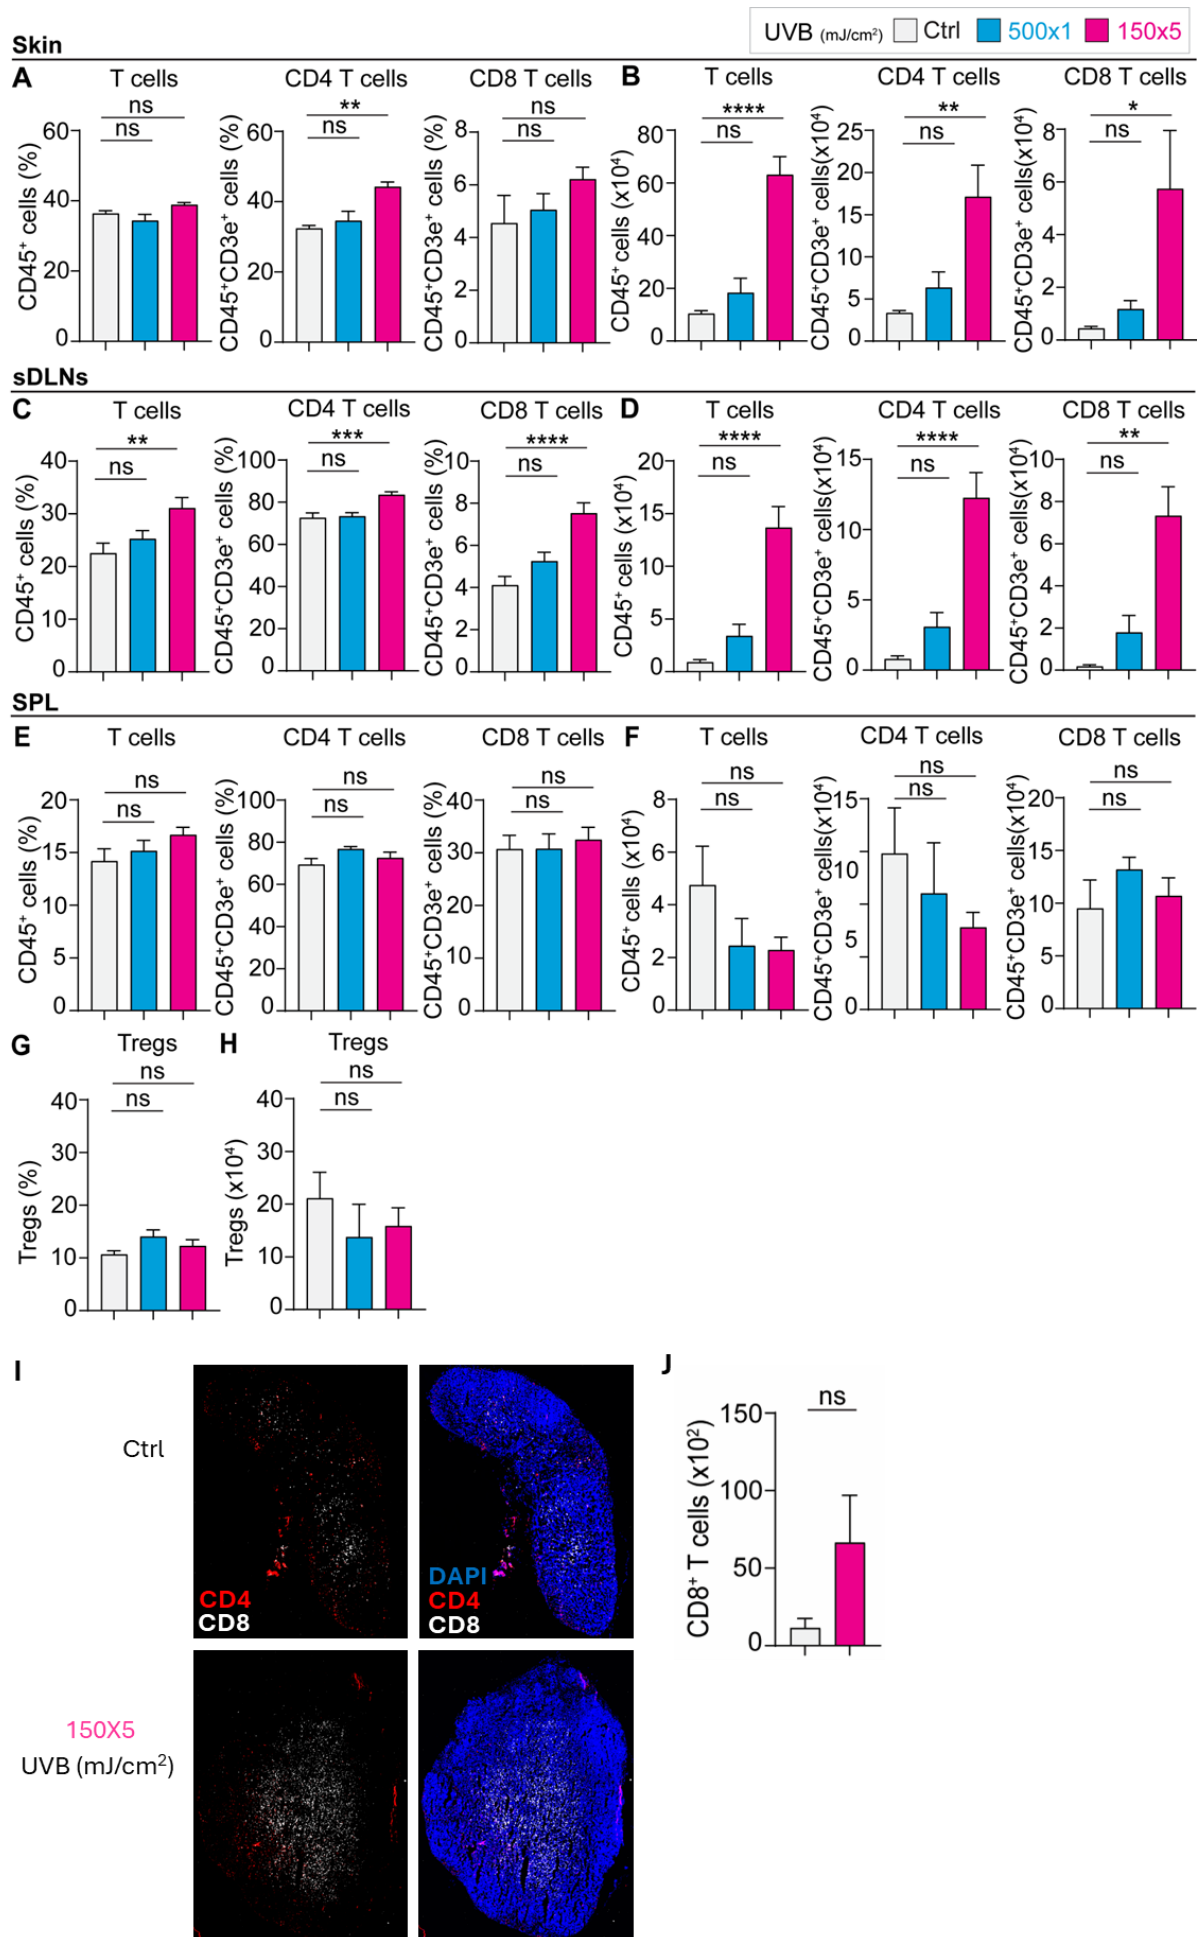

**Figure S2. Analysis of T cells and their subsets following UVB radiation.** Tissue samples including skin, sDLN, and spleen from Foxp3-IRES GFP mice were assessed using flow cytometry after different UVB exposure regimens. Live CD45<sup>+</sup> cells were gated to determine the frequency and total cell number of T cells, CD4<sup>+</sup> T cells, and CD8<sup>+</sup> T cells in Skin (A; frequency, B; absolute cell count), sDLN (C; frequency, D; absolute cell count), and Spleen (E; frequency, F; absolute cell count). (G-H) Frequency and absolute cell count of Tregs in Spleen. (I-J) Representative immunofluorescence staining of sDLNs showing CD4<sup>+</sup> and CD8<sup>+</sup> T cell distribution and CD8<sup>+</sup> T cell quantification. Data are pooled from three independent experiments and represented as mean  $\pm$ SEM (n=10-15). (A-H) Statistical analysis was performed using One-way ANOVA with Dunnett's multiple comparisons test. (J) Statistical significance was assessed using student's t-test. \* $p < 0.05$ , \*\* $p < 0.01$ , \*\*\*,  $P < 0.001$ , \*\*\*\* $p < 0.0001$ , n.s.=not significant. UVB: Ultraviolet B radiation, sDLNs: skin-draining lymph nodes, SPL: spleen.

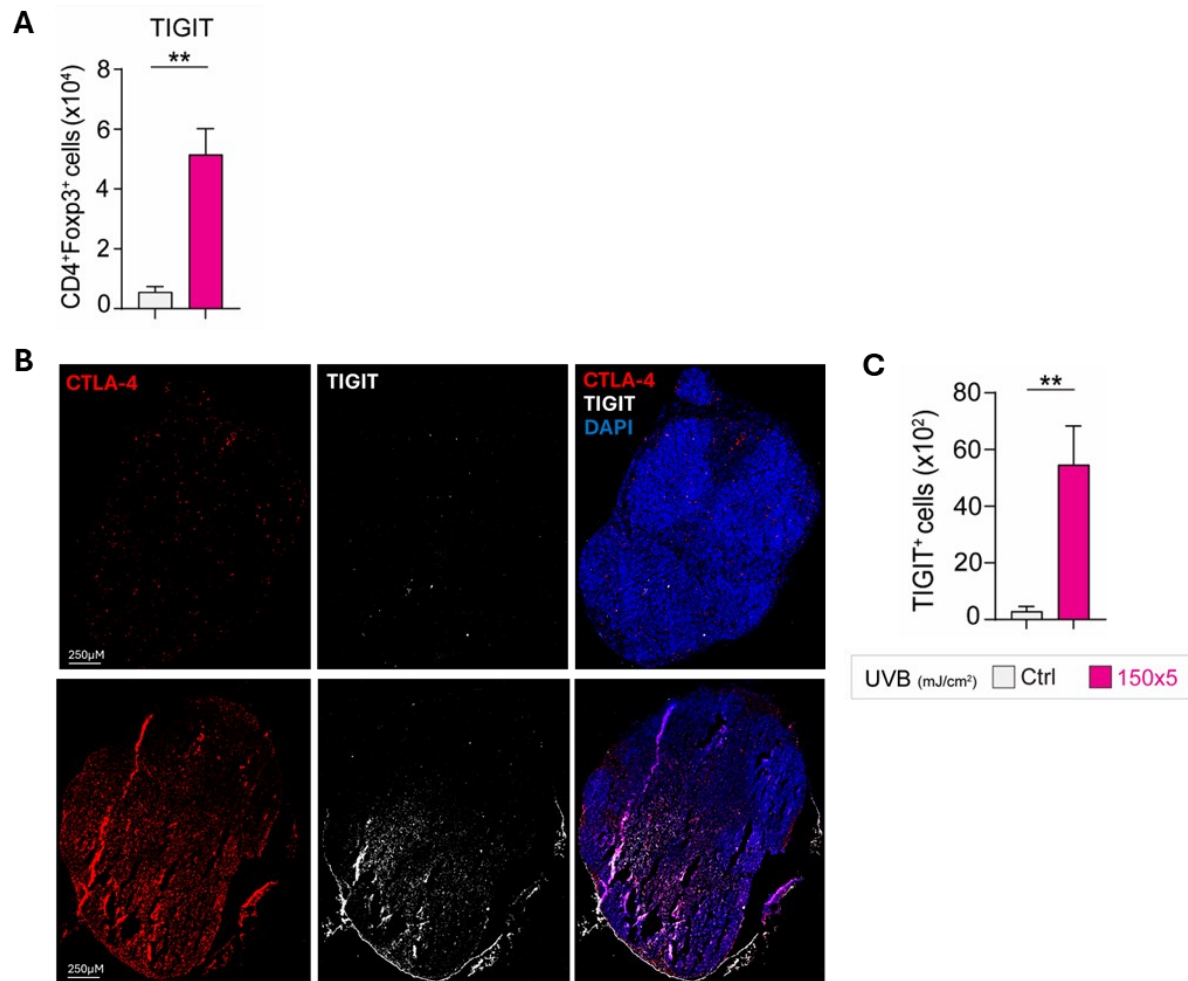

**Figure S3. TIGIT expression in Tregs following UVB exposure.** (A) Abundance of TIGIT<sup>+</sup> Tregs in sDLNs. (B-C) Representative immunofluorescence staining of TIGIT expression in Tregs within sDLNs, along with its quantification. Data pooled from three independent experiments (mean ± SEM). Statistical significance was assessed using student's t-test (n=3-5). \*\*,  $P < 0.01$ . UVB: Ultraviolet B radiation, sDLNs: skin-draining lymph nodes.

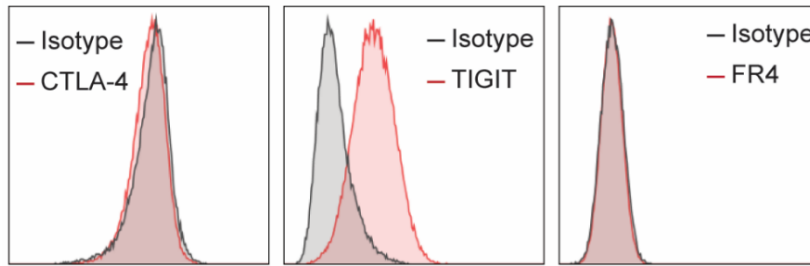

**Figure S4. Intrinsic expression analysis of CTLA-4, TIGIT, and FR4 in SCC cells.**

Representative histograms show the expression levels of CTLA-4, TIGIT, and FR4 on SCC cells. Dark grey lines indicate isotype controls, while red lines represent staining with CTLA-4, TIGIT, and FR4 antibodies respectively.

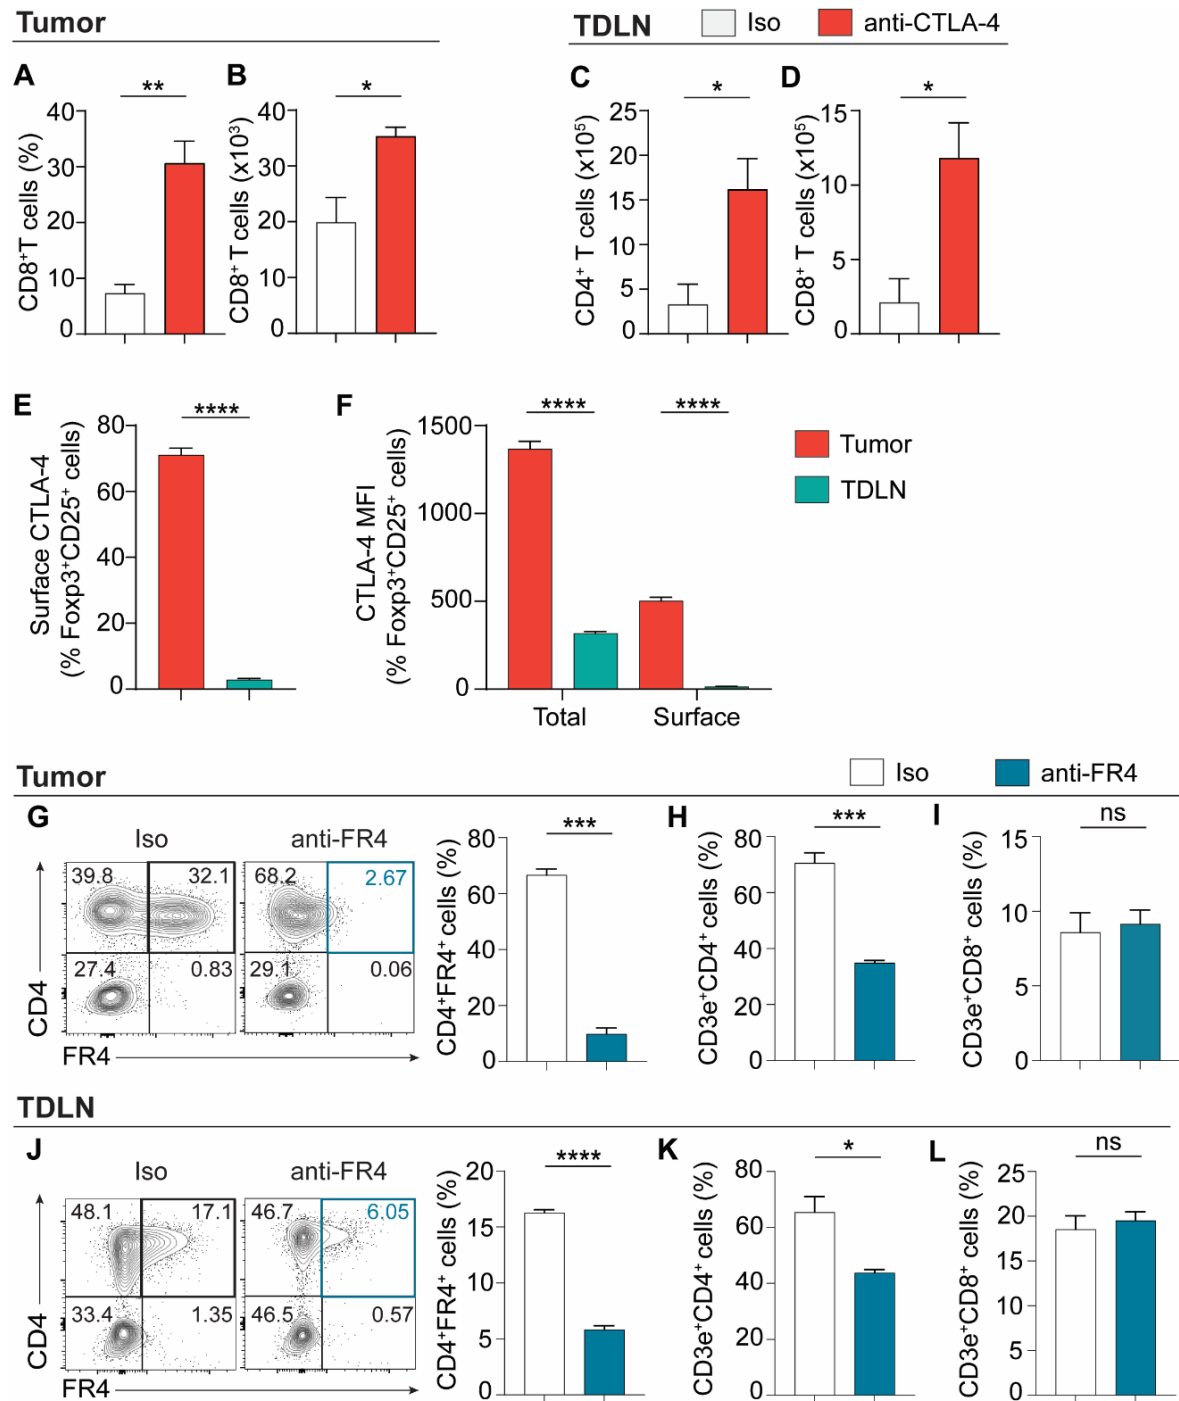

**Figure S5. Immune cell profiling in the tacrolimus-induced SCC model.** (A-B) Anti-CTLA-4: Frequency and total numbers of CD8<sup>+</sup> T cells in tumors; (E-F) CD4<sup>+</sup> and CD8<sup>+</sup> T cell counts in TDLN. (E-F) Surface expression and MFI of CTLA-4 in tumor and TDLN. (G, J) Anti-FR4: Flow plots of CD4<sup>+</sup>FR4<sup>+</sup> T cells and frequencies in tumors and TDLN; (H-I, K-L) CD4<sup>+</sup> and CD8<sup>+</sup> T cell counts in tumors and TDLN. Data are derived from two independent

experiments (n=6-8). Unpaired student's t test was used to determine statistical significance.

$*p < 0.05$ ,  $**p < 0.01$ ,  $***, P < 0.001$ ,  $****p < 0.0001$ , n.s.=not significant. TDLN: Tumor-draining lymph node, MFI: Mean fluorescent intensity.



**Table S1. List of key resources used in this study.**

| REAGENT/RESOURCE                                   | SOURCE          | IDENTIFIER          |
|----------------------------------------------------|-----------------|---------------------|
| Antibodies                                         |                 |                     |
| CD45 – BV650                                       | BD Biosciences  | Cat# 563410         |
| CD3e – BUV737                                      | BD Biosciences  | Cat# 612771         |
| CD4 – BUV395                                       | BD Biosciences  | Cat# 563790         |
| CD8 $\beta$ – APC-Cy7                              | BioLegend       | Cat# 126619         |
| CD8 $\beta$ – AF647                                | BioLegend       | Cat# 126612         |
| CD25 – FITC                                        | BioLegend       | Cat# 101908         |
| CD25- APC                                          | BioLegend       | Cat# 102012         |
| Foxp3 –AF647                                       | BioLegend       | Cat# 126408         |
| CD152 – PE                                         | BioLegend       | Cat# 106305         |
| TIGIT – PE-Cy7                                     | BioLegend       | Cat# 142107         |
| FR4 – PE-CF594                                     | BioLegend       | Cat# 125016         |
| Ki67 – BV605                                       | BioLegend       | Cat# 652413         |
| LIVE/DEAD™ Fixable Aqua Dead Cell Stain Kit        | Thermo Fisher   | Cat# L34957         |
| CD16/CD32                                          | BD Biosciences  | Cat# 553142         |
| Anti-mCTLA4-mIgG2a InvivoFit™                      | InvivoGen       | Cat# mctla4-mab10-1 |
| Anti-mTIGIT-mIgG2a InvivoFit™                      | InvivoGen       | Cat# mtigit-mab10-1 |
| FR4 Monoclonal Antibody                            | Thermo Fisher   | Cat# 16-5446-85     |
| InVivoMAb anti-mouse CD8 $\beta$                   | BioXCell        | Cat# BE0223         |
| InVivoPlus anti-mouse CD4                          | BioXCell        | Cat# BP0003-1       |
| Anti- $\beta$ -Gal-mIgG2a InvivoFit™               | InvivoGen       | Cat# bgal-mab10-1   |
| InVivoPlus rat IgG2b isotype control               | BioXCell        | Cat# BE0090         |
| InVivoMAb rat IgG1 isotype control                 | BioXCell        | Cat# BE0088         |
| Rat IgG2b kappa isotype control                    | Thermo Fisher   | Cat# 16-4031-81     |
| Chemicals, peptides, and recombinant proteins      |                 |                     |
| DMEM, high glucose                                 | Gibco           | Cat# 11965092       |
| Ham's F-10 Nutrient Mix                            | Gibco           | Cat# 11550043       |
| Phosphate Buffer Saline                            | Gibco           | Cat# 10010023       |
| Fetal Bovine Serum (FBS)                           | Gibco           | Cat# 10099141       |
| Trypsin-EDTA (0.05%), phenol red                   | Gibco           | Cat# 25300062       |
| Penicillin/Streptomycin/glutamate                  | Gibco           | Cat# 10378016       |
| Insulin                                            | Sigma-Aldrich   | Cat# I2643          |
| Hydrocortisone                                     | Sigma-Aldrich   | Cat# H0888          |
| Human EGF recombinant protein                      | Gibco           | Cat# PHG0311        |
| Adenine                                            | Sigma-Aldrich   | Cat# A2786          |
| Cholera toxin from <i>Vibrio cholera</i>           | Sigma-Aldrich   | Cat# C8052          |
| Collagenase D from <i>Clostridium histolyticum</i> | Roche           | Cat# 11088866001    |
| DNase I from bovine pancreas                       | Roche           | Cat# 11284932001    |
| Ovalbumin                                          | Sigma-Aldrich   | Cat# A5503          |
| Saponin from quillaja bark                         | Sigma-Aldrich   | Cat# S7900          |
| DAPI                                               | Thermo Fisher   | Cat# 62248          |
| Triton X-100                                       | Sigma-Aldrich   | Cat# T8787          |
| Flow-Count Fluorospheres                           | Beckman Coulter | Cat# 7547053        |

|                                                 |                                                     |                                                                  |
|-------------------------------------------------|-----------------------------------------------------|------------------------------------------------------------------|
| Foxp3 /Transcription Factor Staining Buffer Set | eBioscience                                         | Cat# 00552300                                                    |
| Software and Algorithms                         |                                                     |                                                                  |
| FlowJo software                                 | FlowJo, LLC                                         | <a href="http://www.flowjo.com">www.flowjo.com</a> .             |
| GraphPad Prism (version 9.1)                    | GraphPad Software, Inc.                             | <a href="http://www.graphpad.com">www.graphpad.com</a> .         |
| ImageJ                                          | NIH                                                 | Version 1.50i                                                    |
| QuPath v.0.1.3                                  | Queen's University,<br>Belfast, Northern<br>Ireland | <a href="http://www.qupath.github.io">www.qupath.github.io</a> . |
