# Supplementary material for: Immunomodulation of UVB-induced regulatory T cells prevents the establishment of squamous cell carcinoma
Source: Research Square preprint supplement (doi:10.21203/rs.3.rs-6935431/v1), 2025-07-03
Supplement: Supplementary file 2 [file a5162746680bb4622d81e922.pdf]

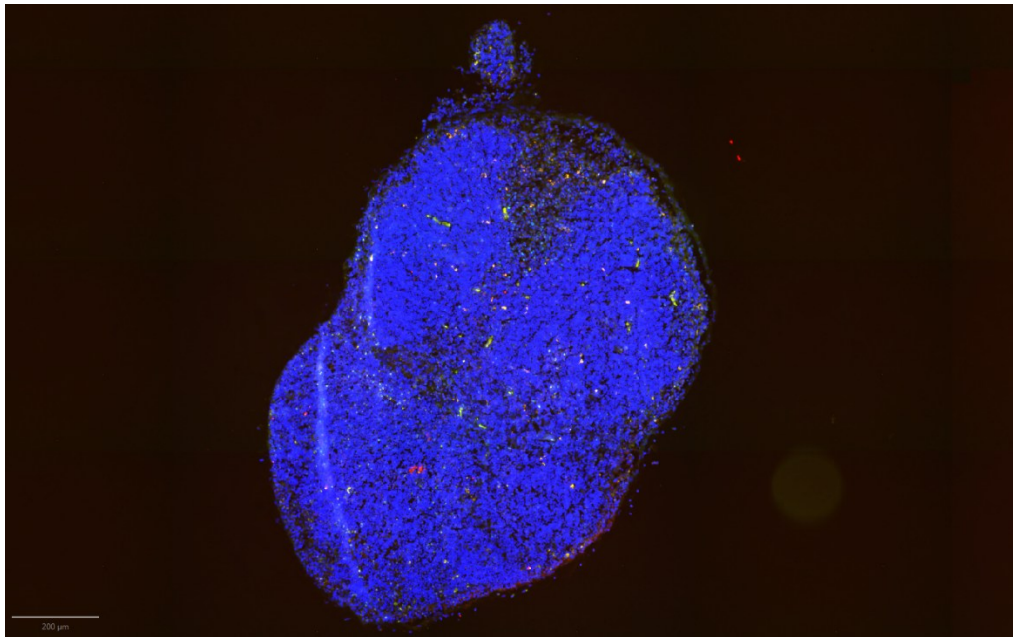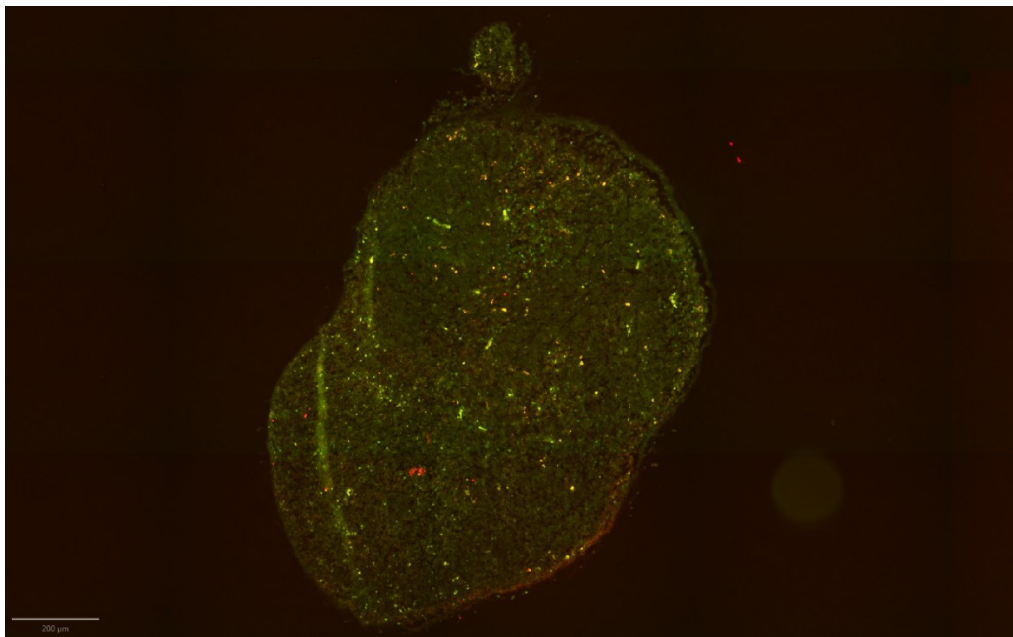

**DAPI, FITC, Cy5, mCherry (20X)**

**Figure 1G- Ctrl**

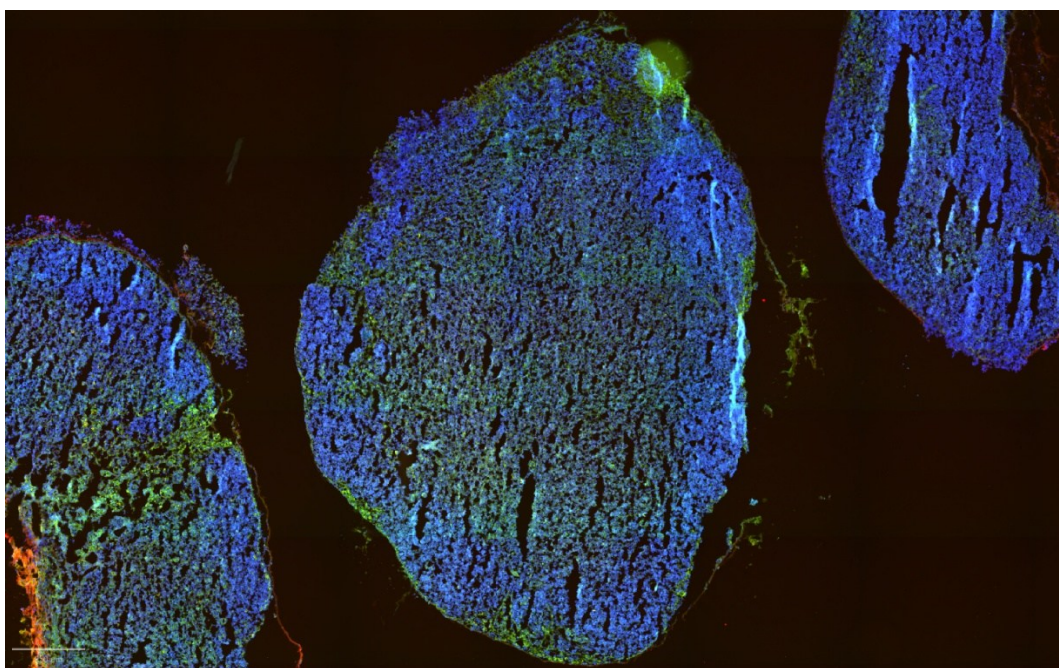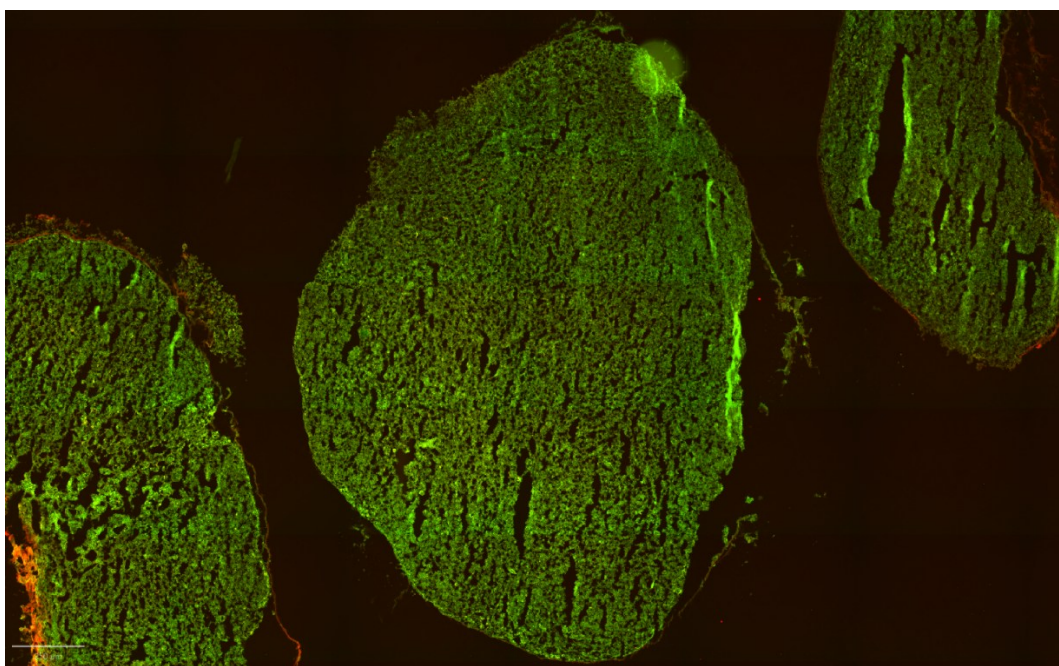

DAPI, FITC, Cy5, mCherry (20X)

Figure 1G- 150x5 (UVB mJ/cm<sup>2</sup>)



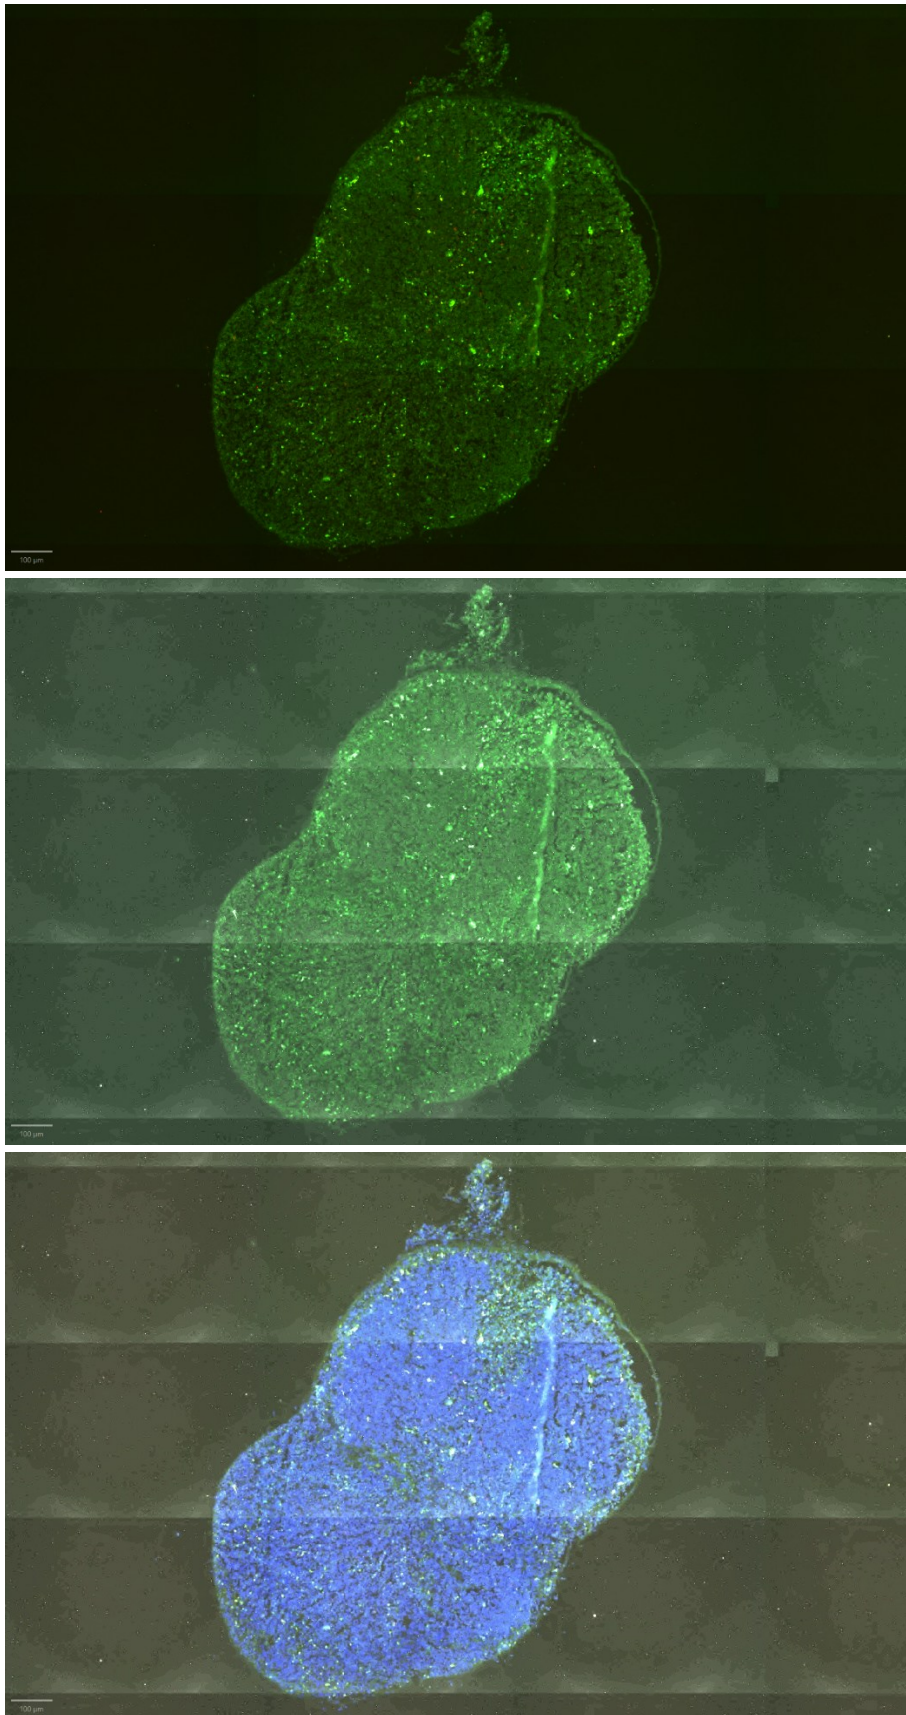

DAPI, FITC, Cy5, mCherry (20X)

Figure 2D- Ctrl

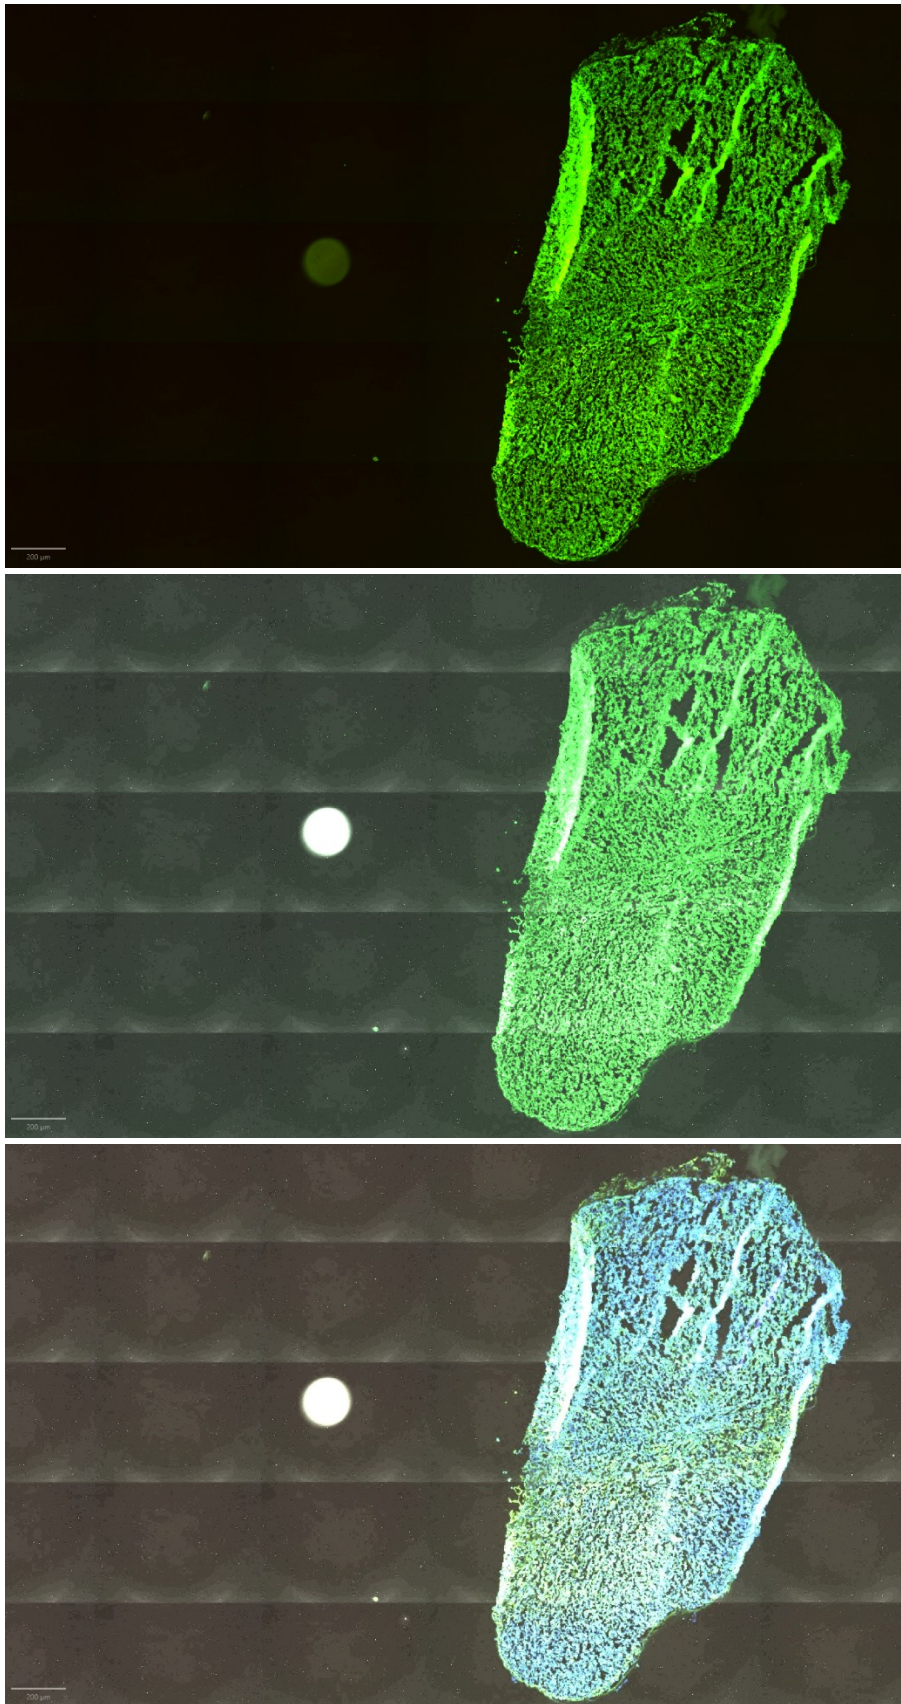

DAPI, FITC, Cy5, mCherry (20X)

Figure 2D- 150x5 (UVB mJ/cm<sup>2</sup>)



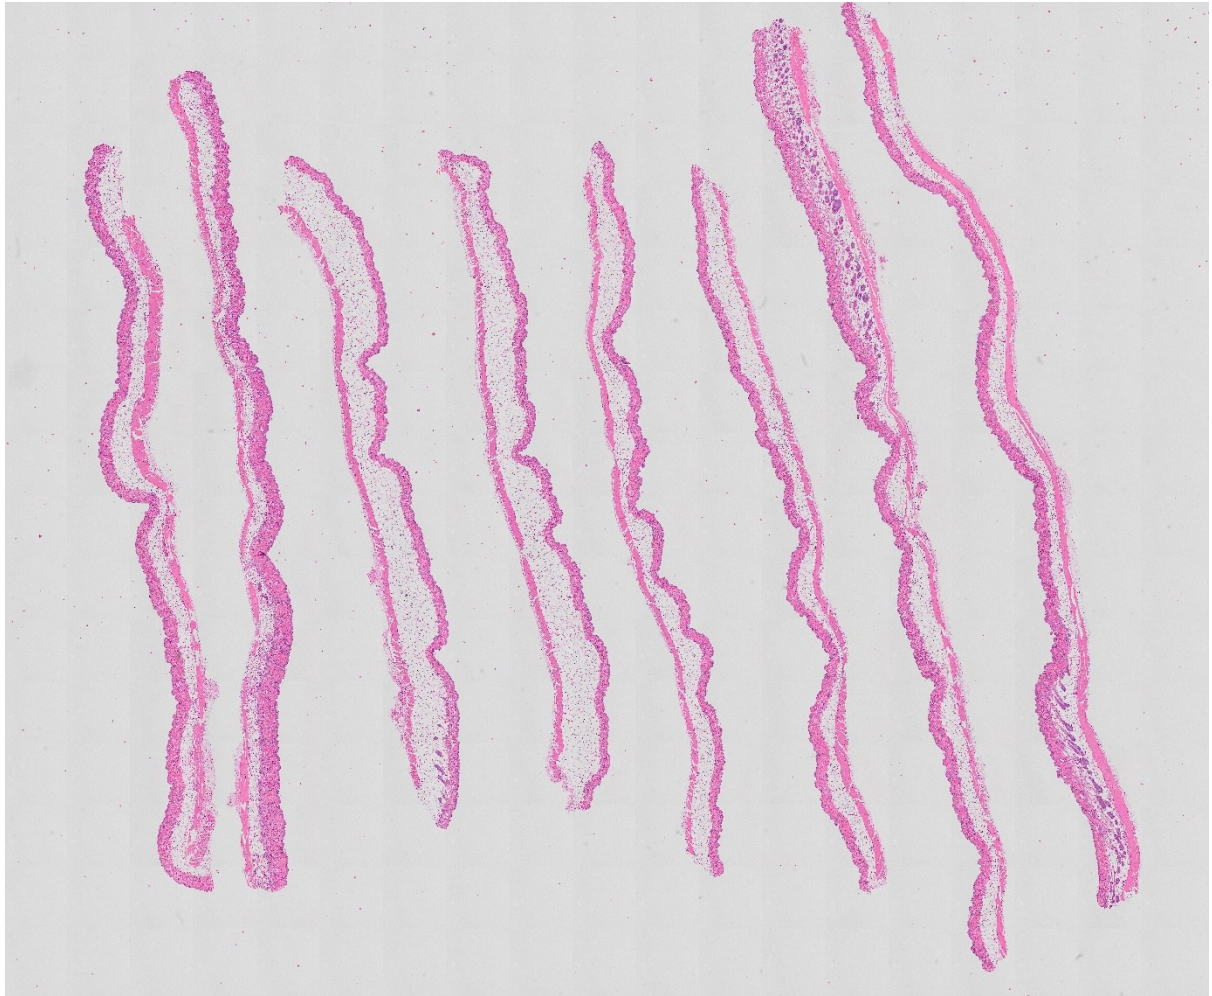

**Figure 5D- Ctrl-Skin**

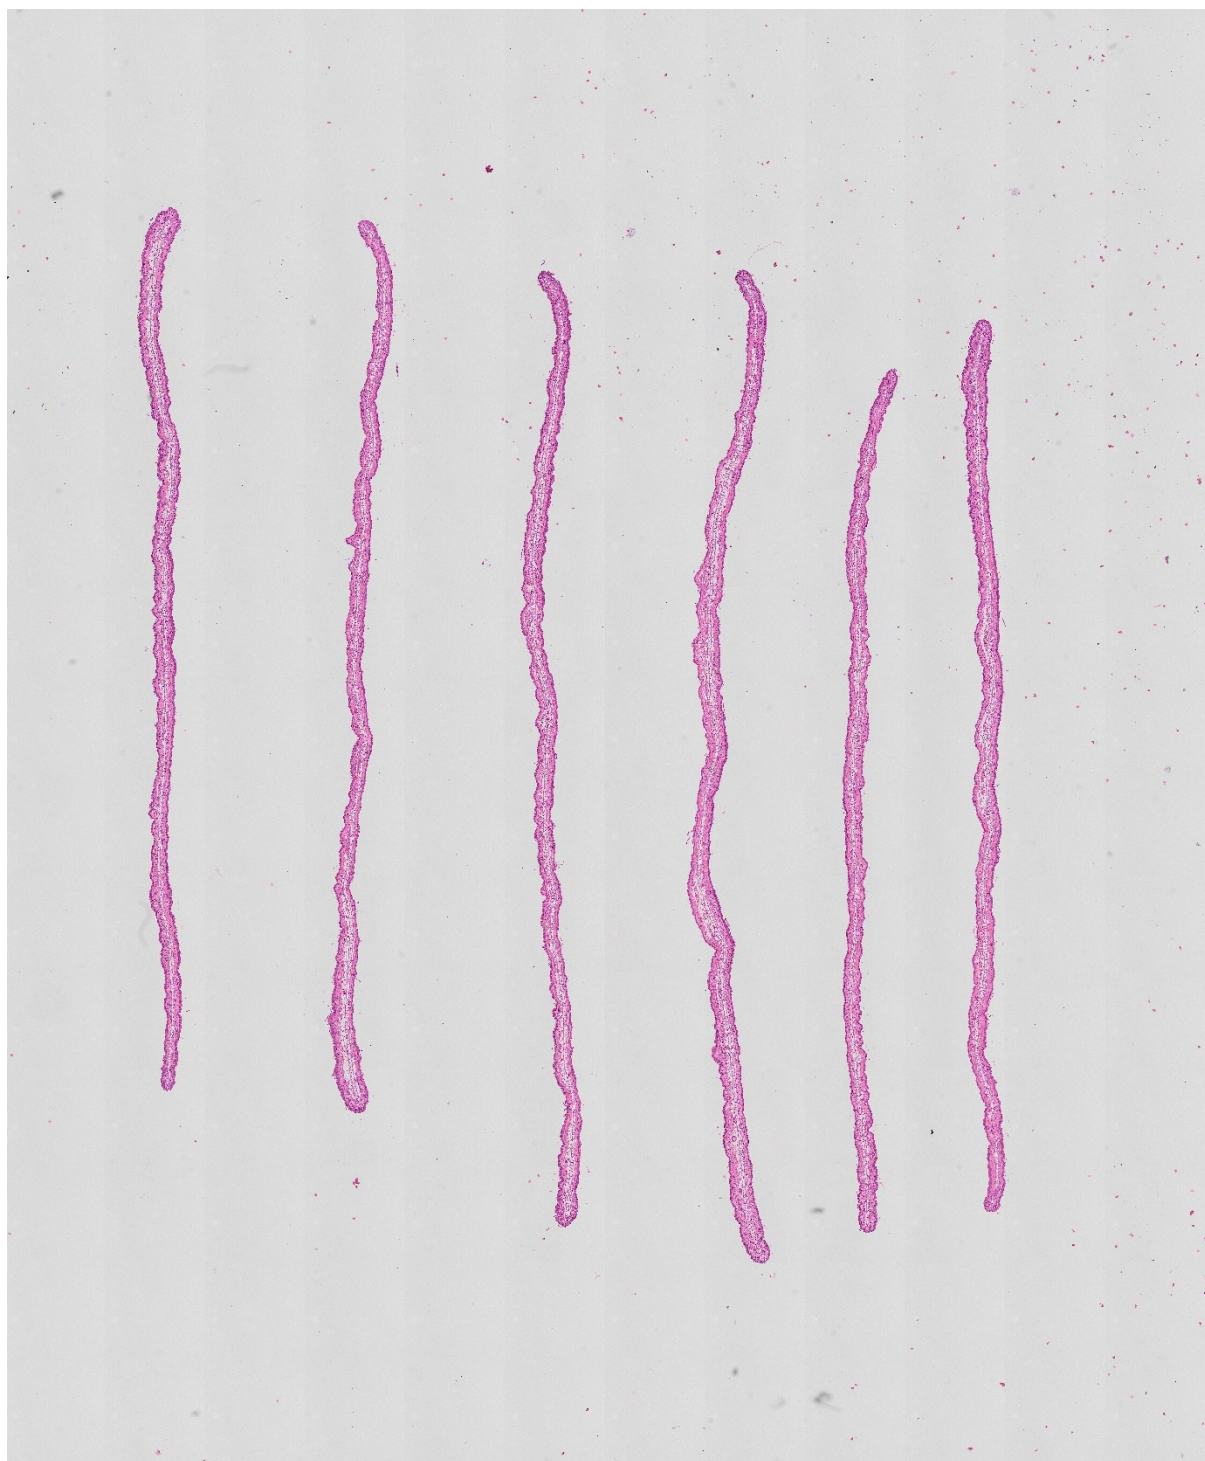

**Figure 5D- Ctrl-Ears**



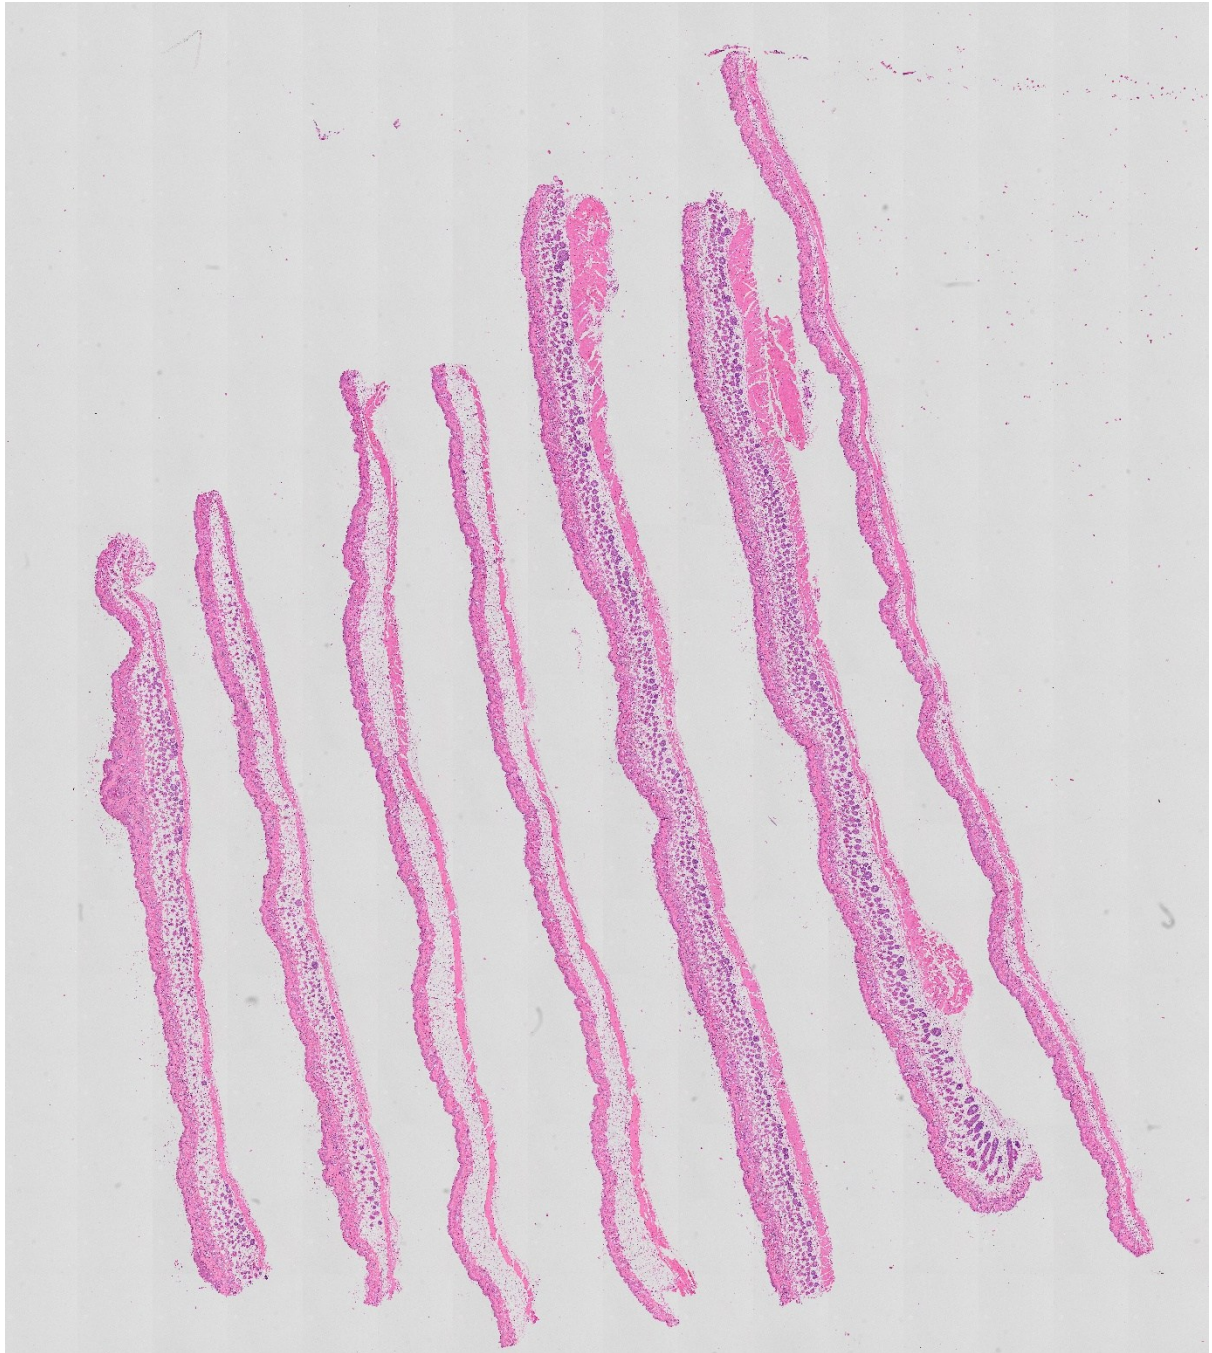

**Figure 5D- 8 weeks UVB-Skin**

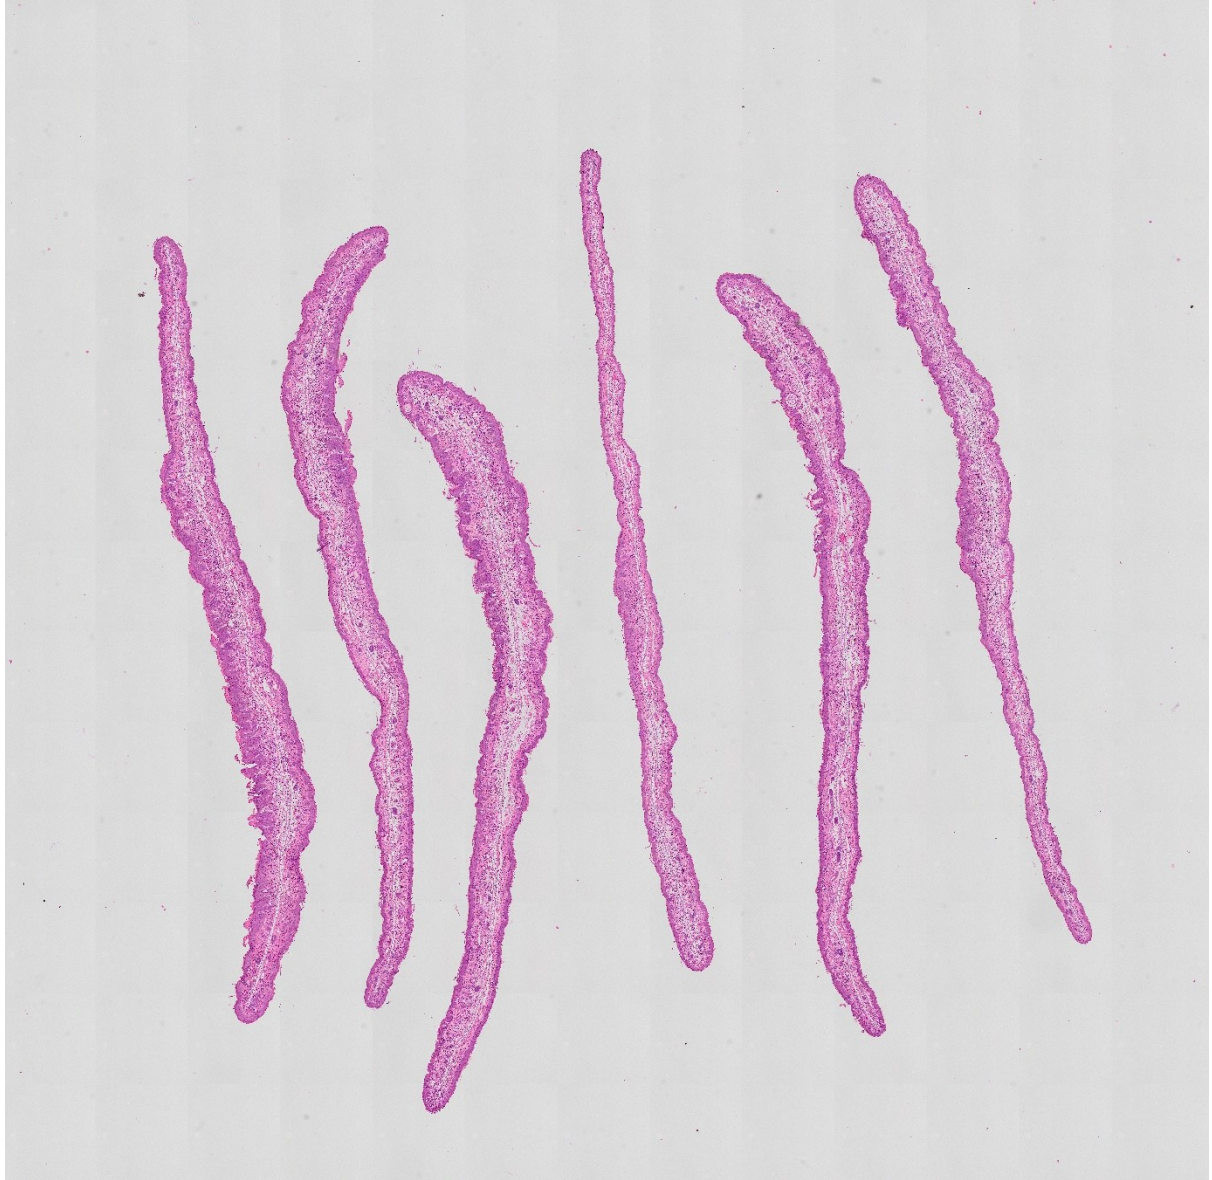

**Figure 5D- 8 weeks UVB-Ears**



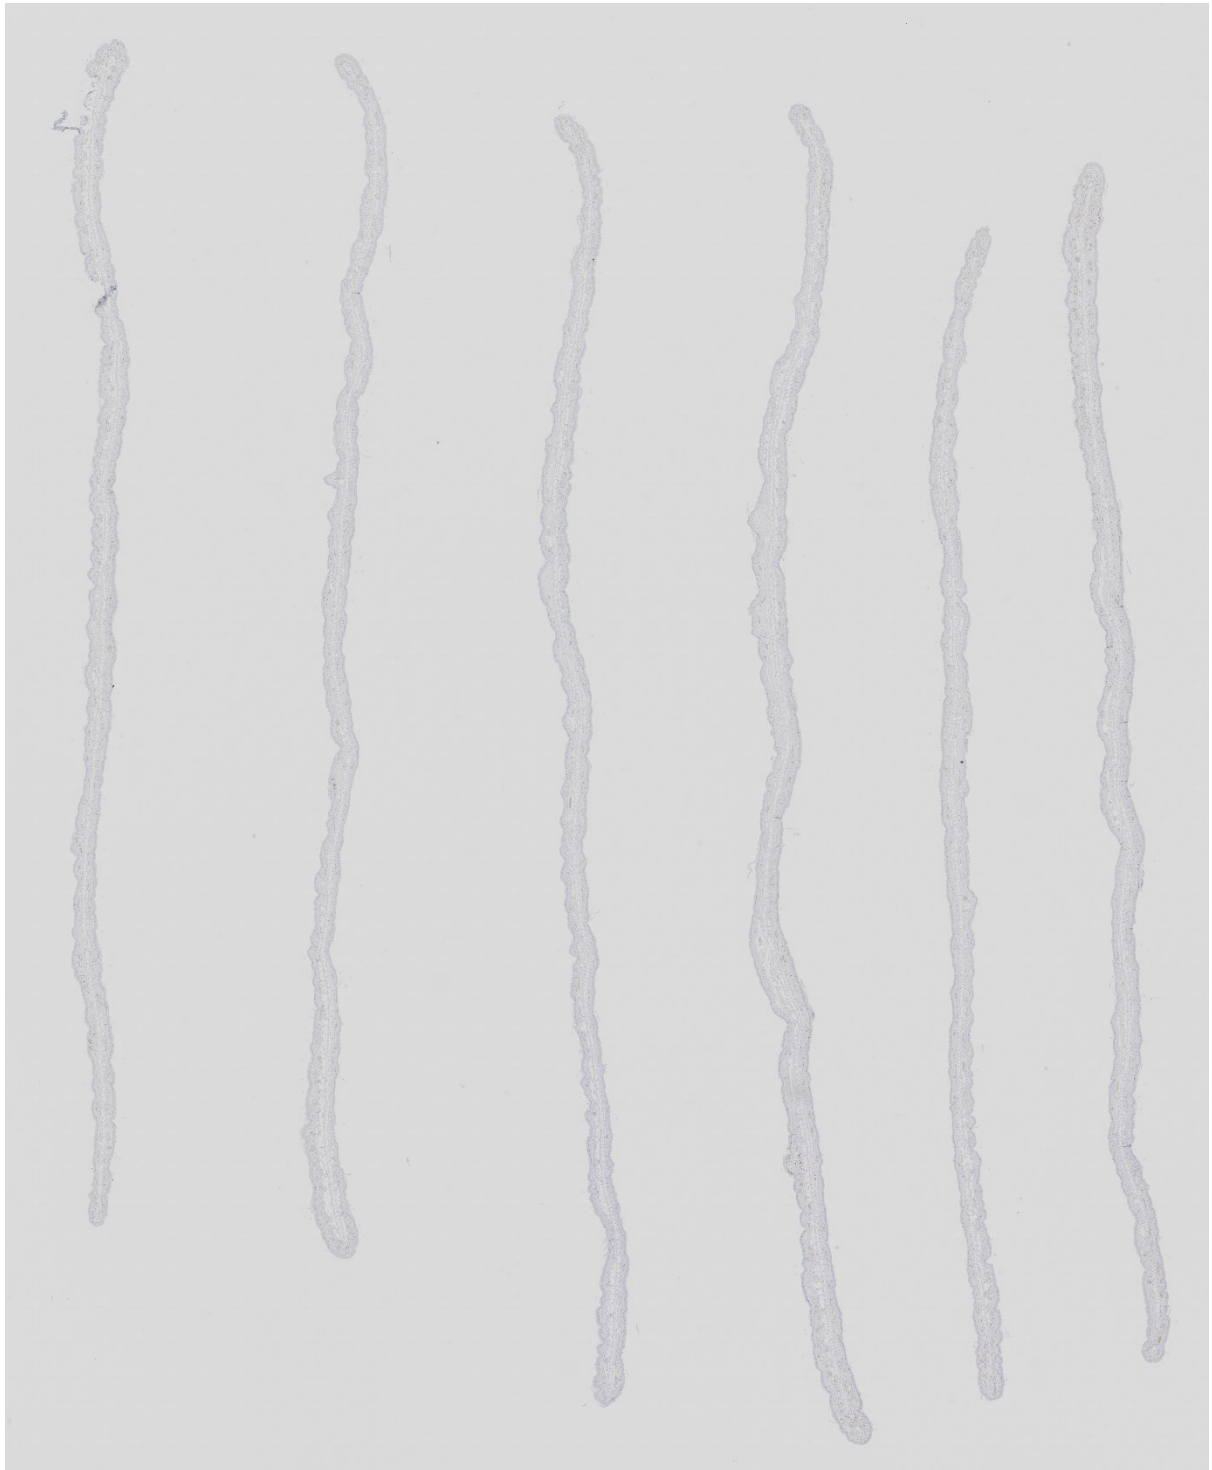

**Figure 5E- No UVB- CD8 (Ears)**

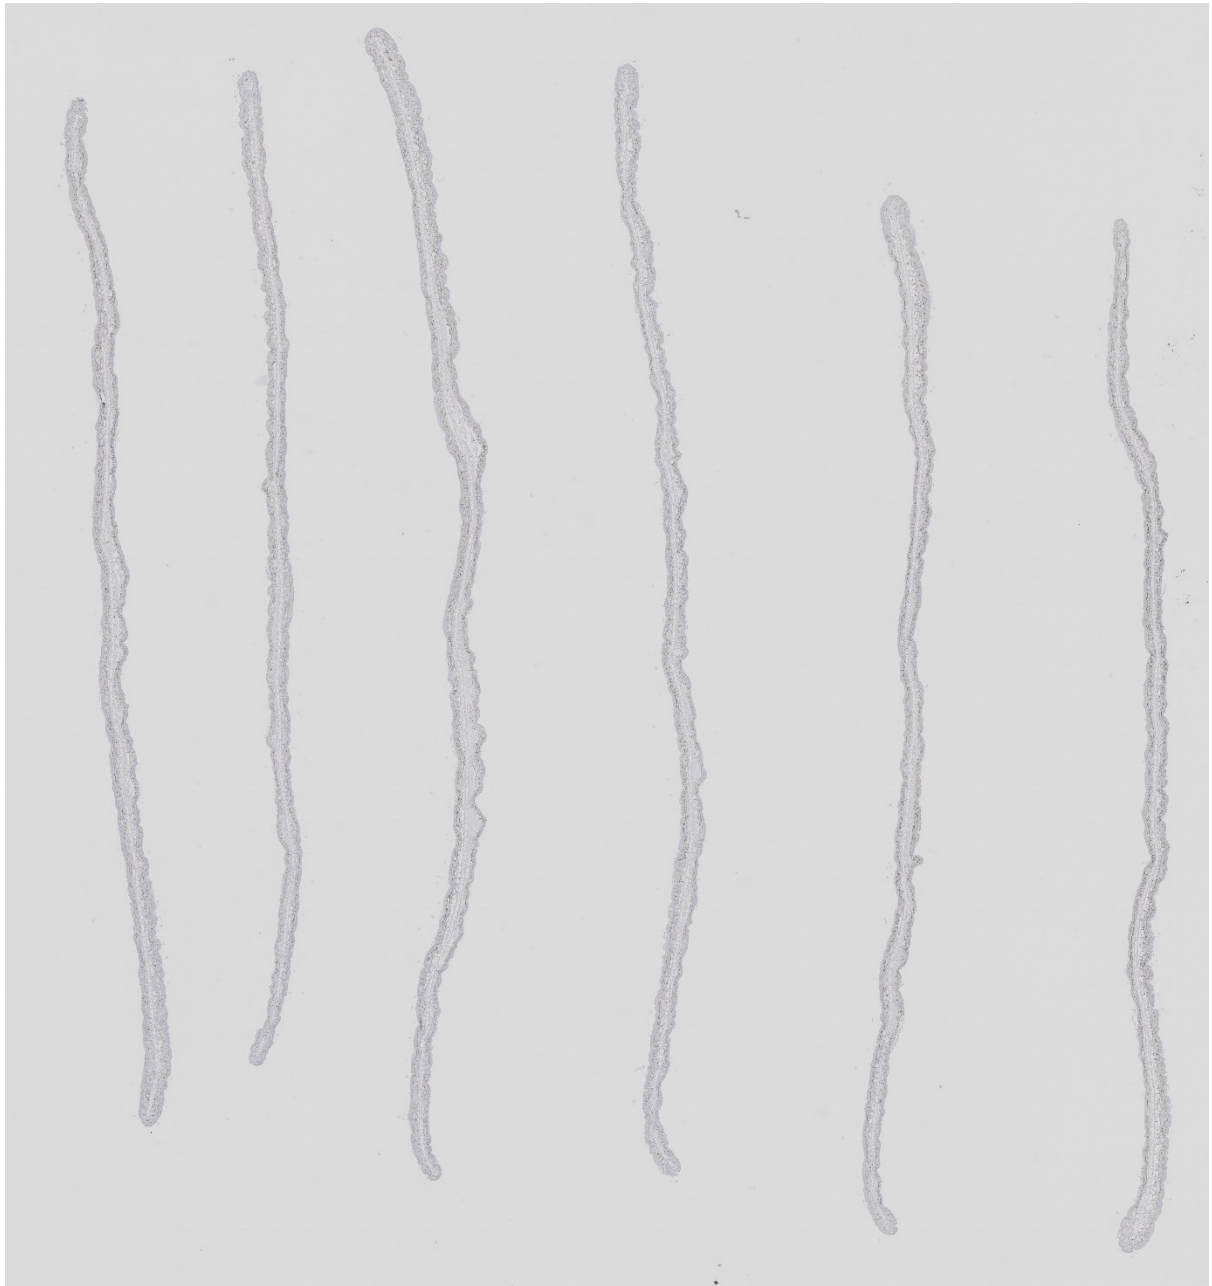

**Figure 5E- No UVB- CD4 (Ears)**



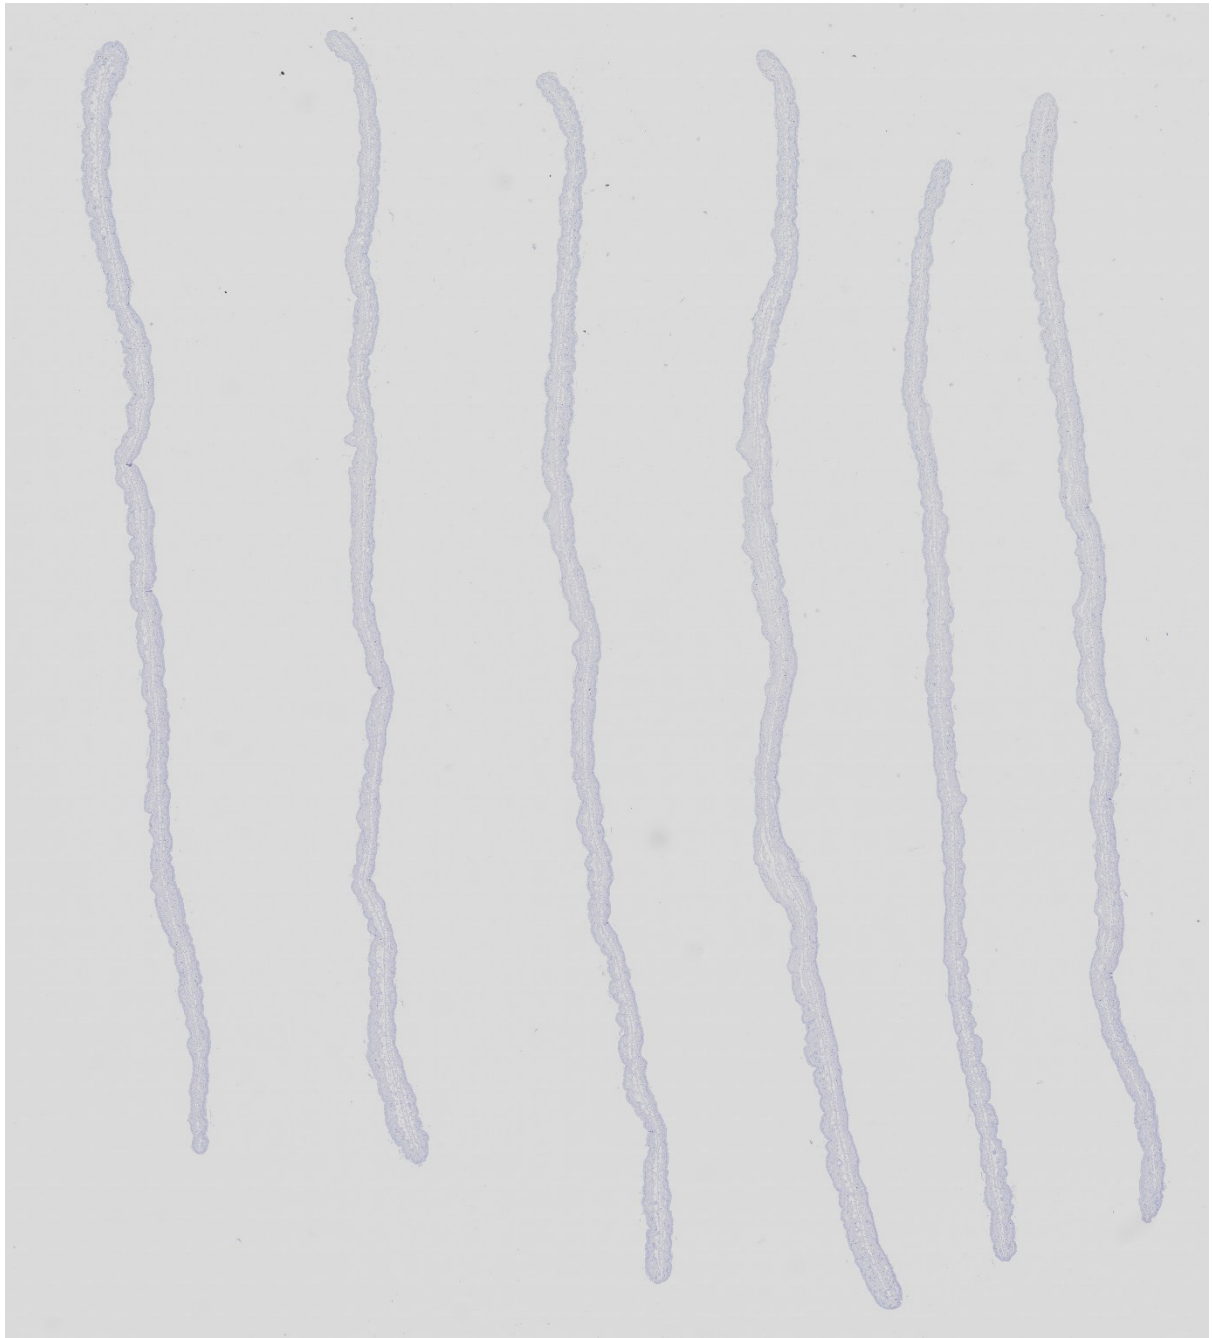

**Figure 5E- No UVB- Foxp3 (Ears)**

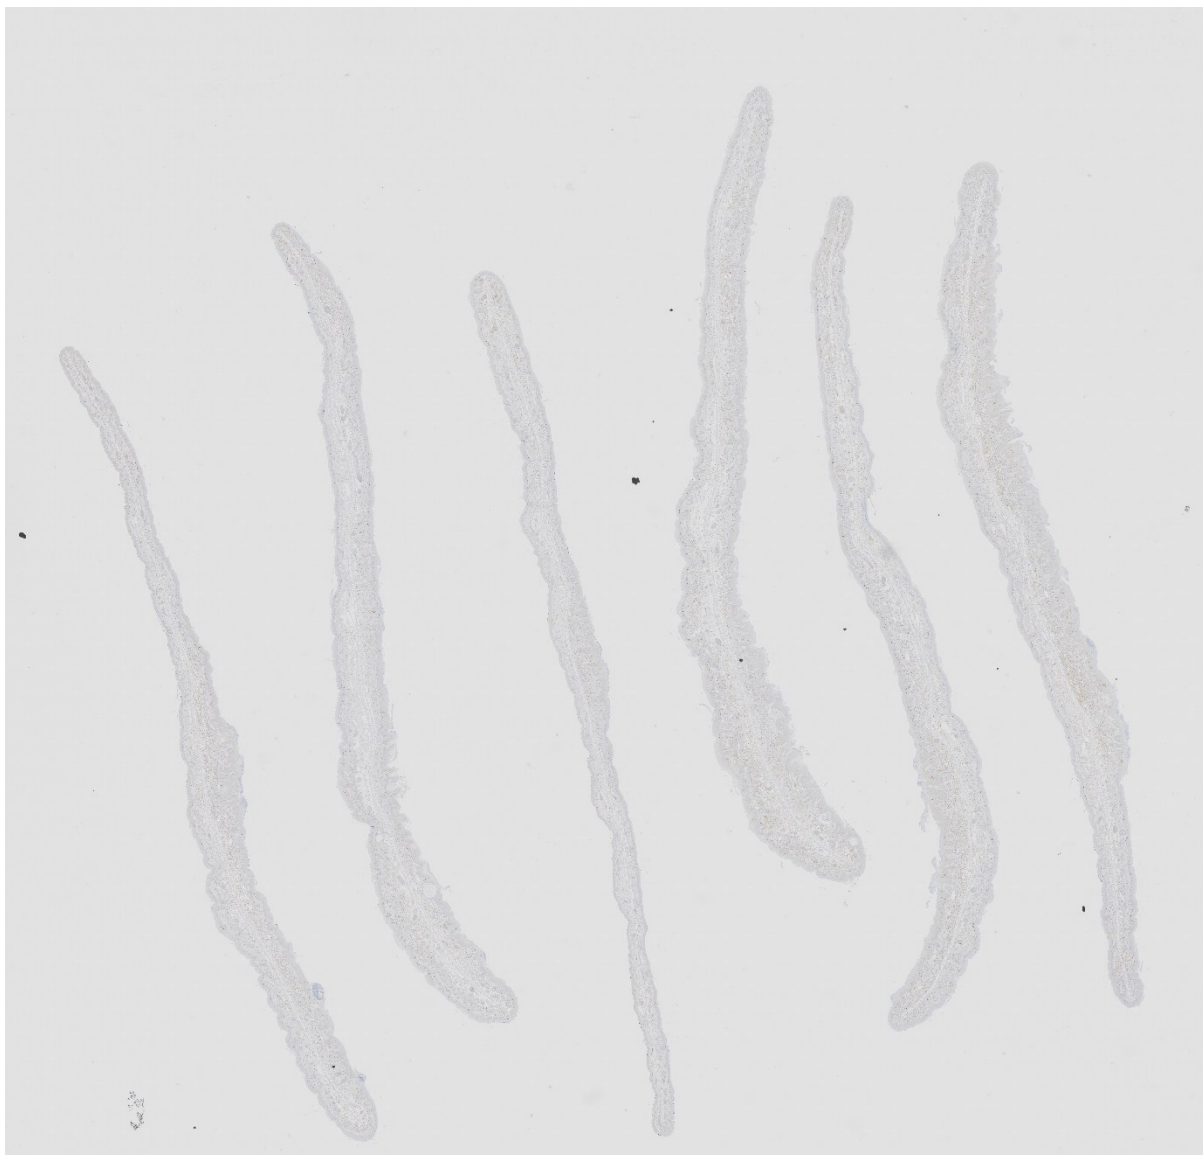

**Figure 5E- 8 weeks UVB- CD8 (Ears)**



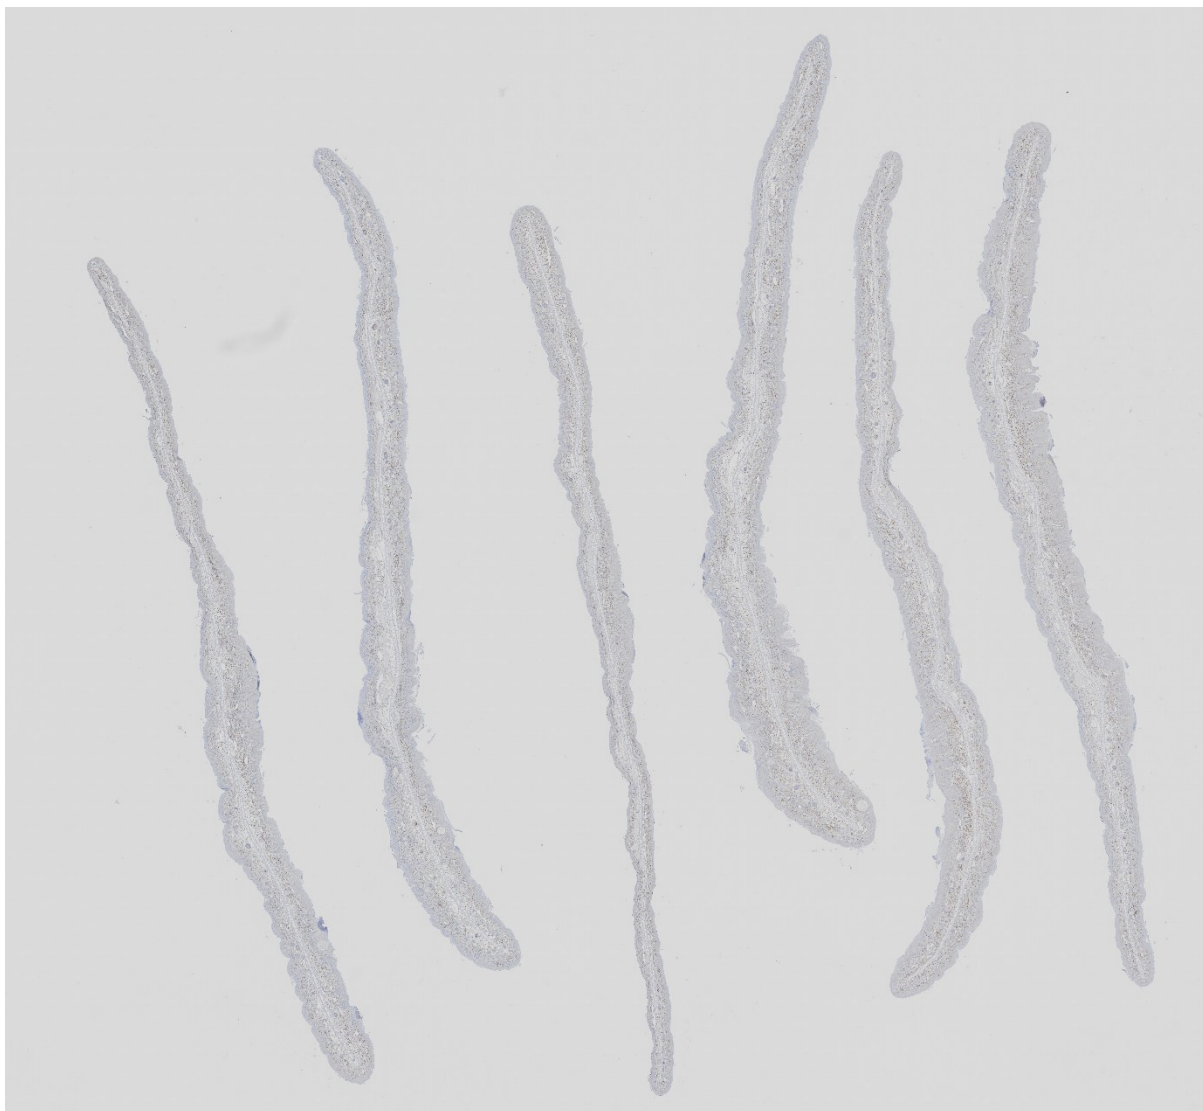

**Figure 5E- 8 weeks UVB- CD4 (Ears)**

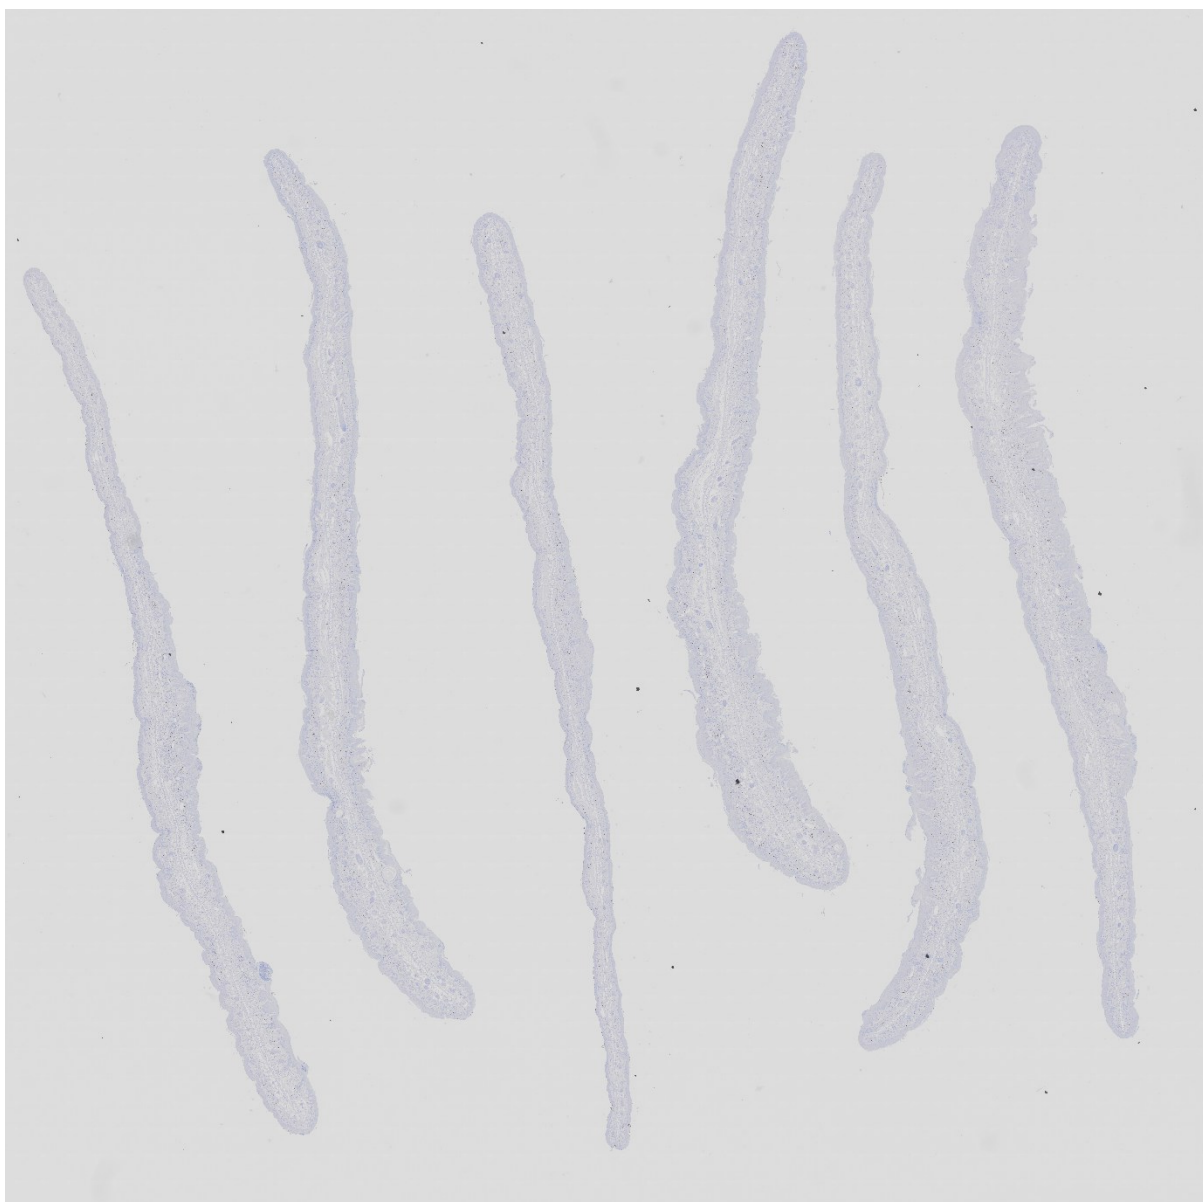

**Figure 5E- 8 weeks UVB- Foxp3 (Ears)**



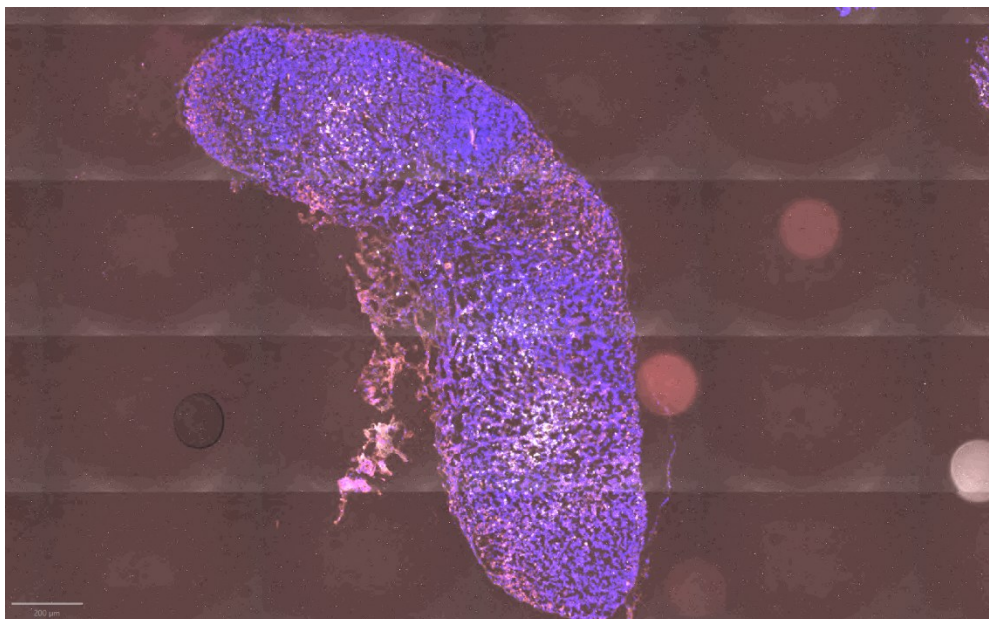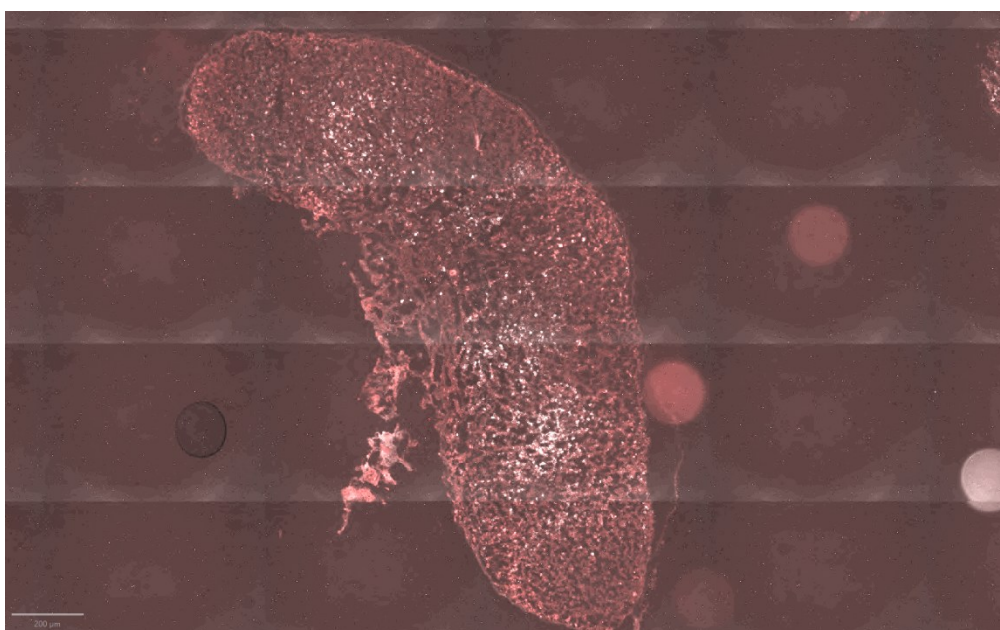

**DAPI, FITC, Cy5, mCherry (20X)**

**Figure S2- Ctrl**

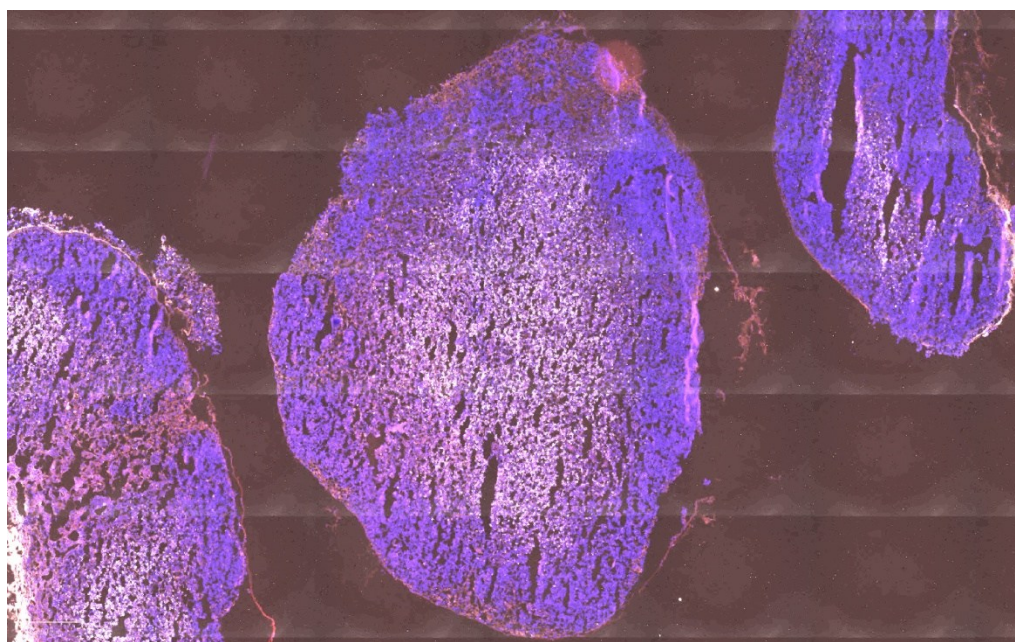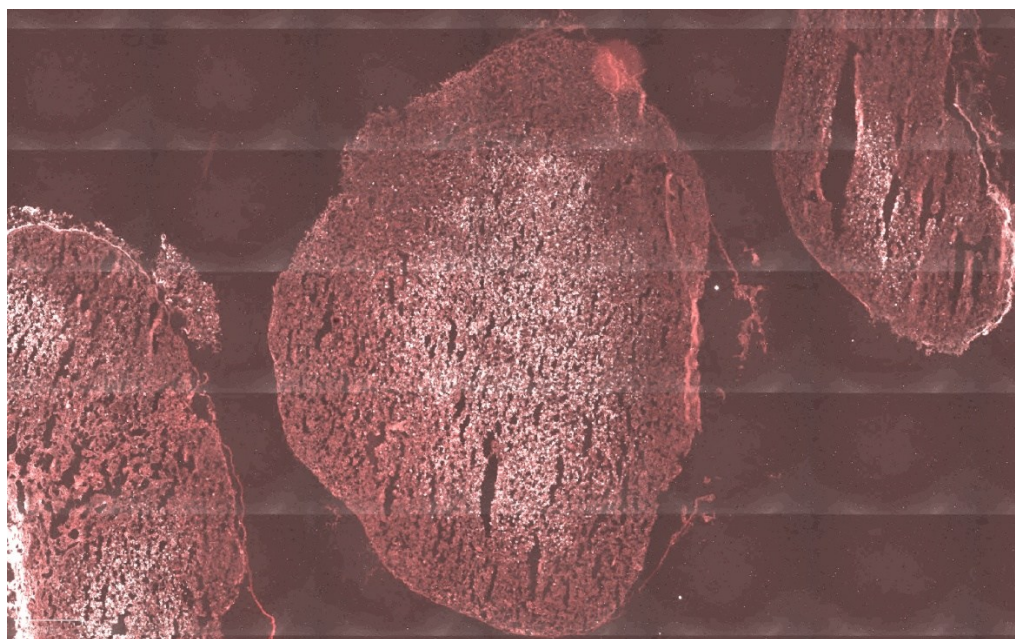

DAPI, FITC, Cy5, mCherry (20X)

Figure S2- 150x5 (UVB mJ/cm<sup>2</sup>)



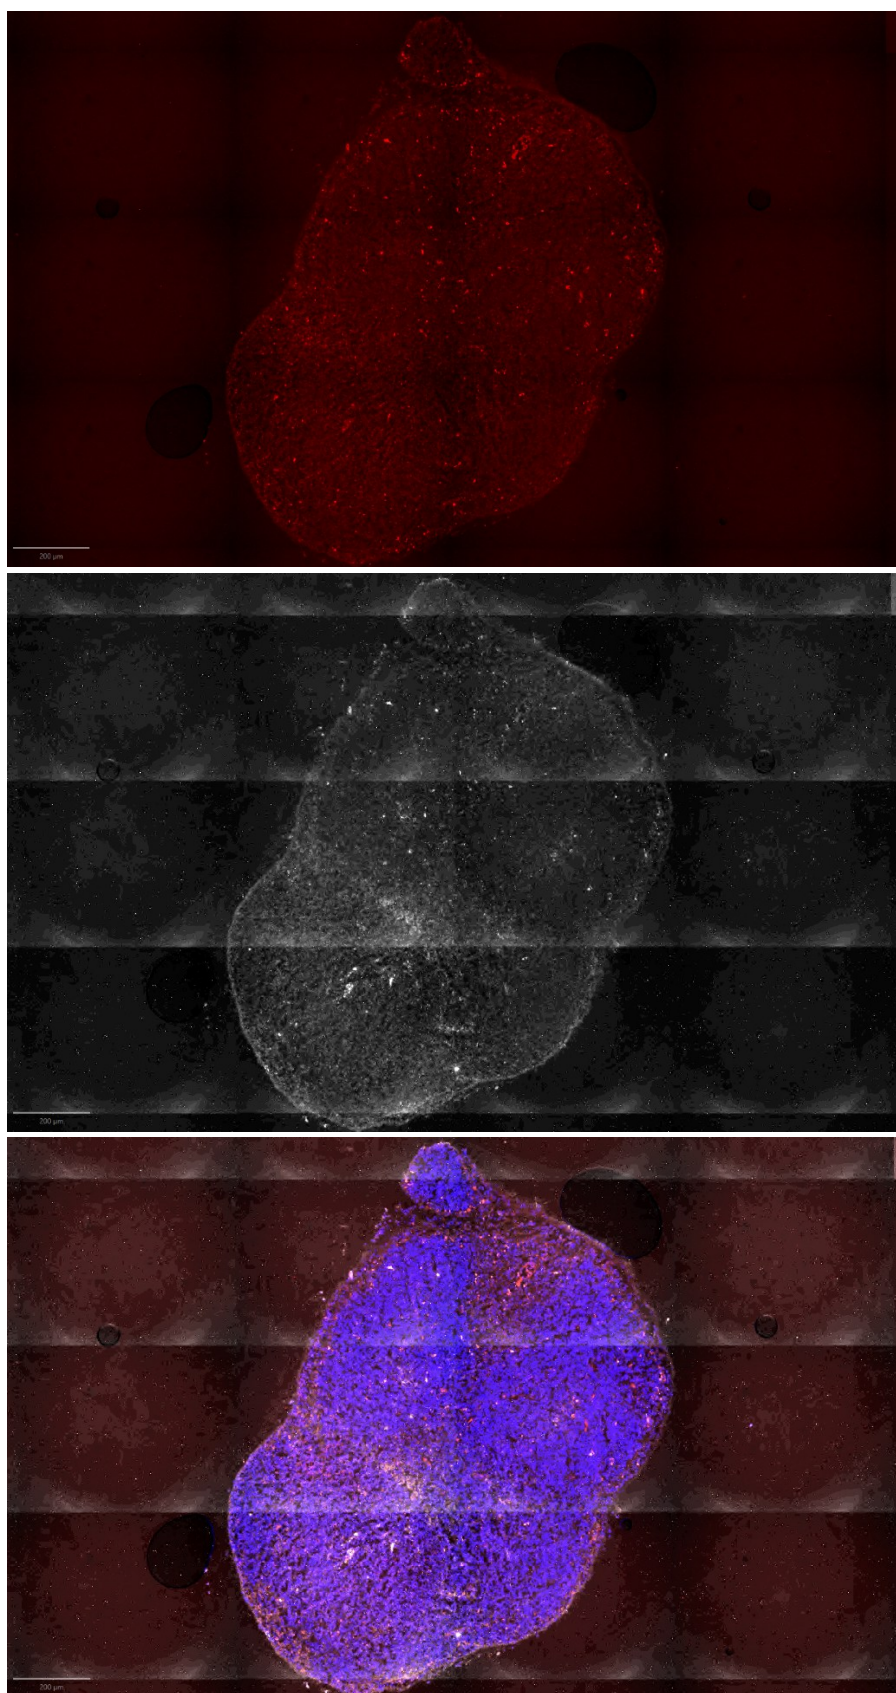

DAPI, FITC, Cy5, mCherry (20X)

Figure S3- Ctrl

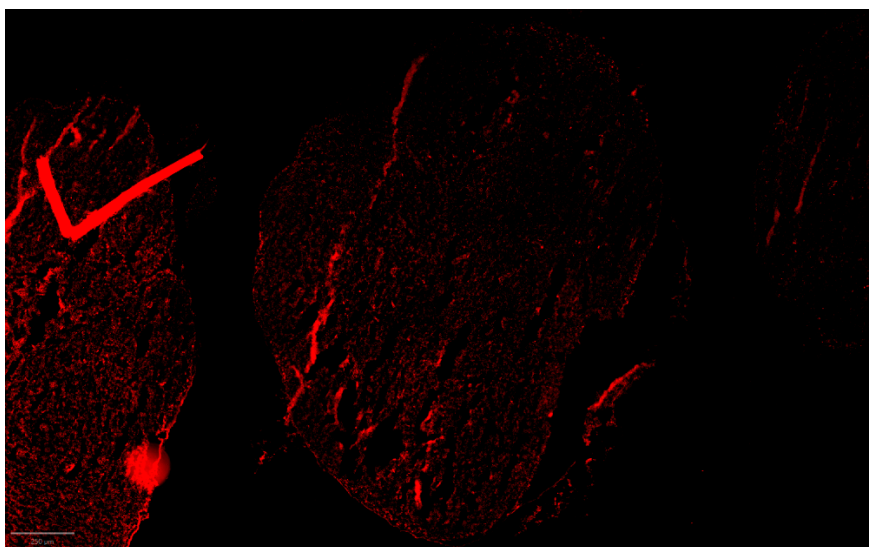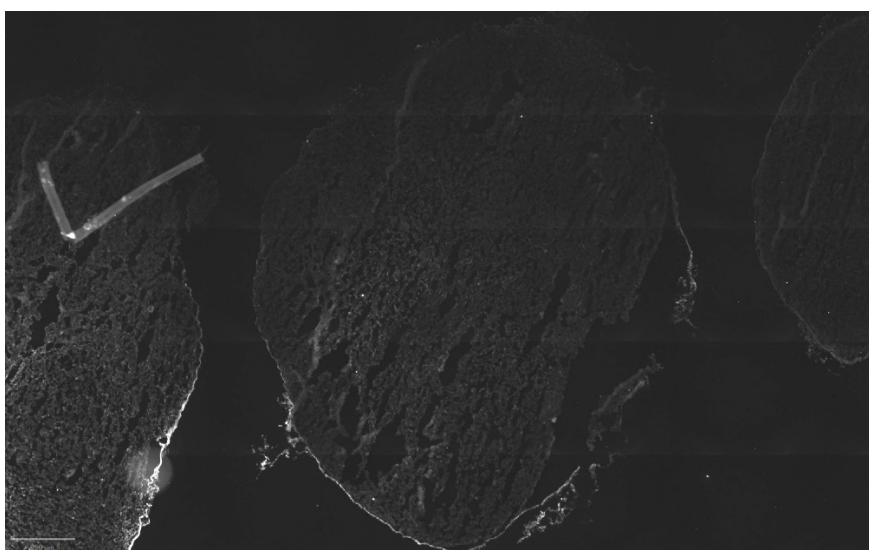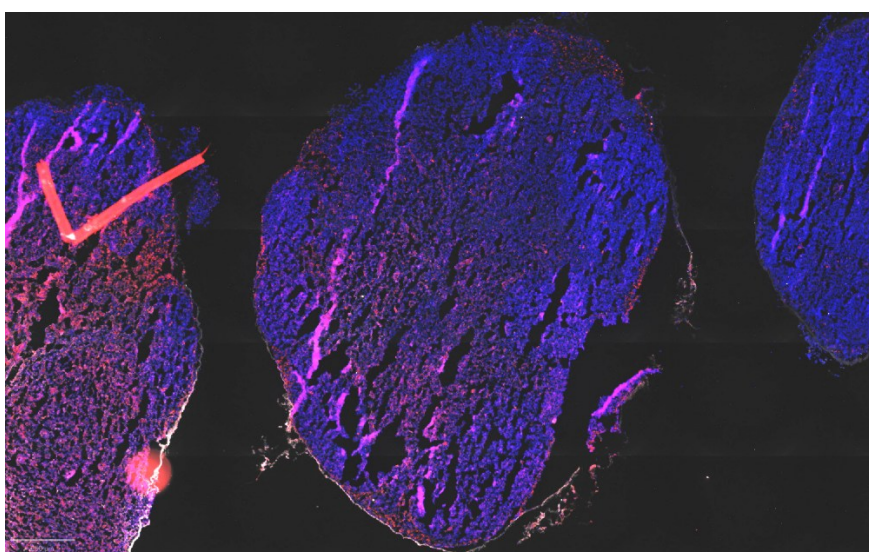

DAPI, FITC, Cy5, mCherry (20X)

Figure S3- 150x5 (UVB mJ/cm<sup>2</sup>)
